# Supplementary material
Source: PubMed Central journal article supplement (PMC4550559)
Supplement: NIHMS707127-supplement-Online_Supplementary_Material.pdf [file NIHMS707127-supplement-Online_Supplementary_Material.pdf]

ONLINE SUPPLEMENT

**Remote Ischemic Conditioning Alters Methylation and Expression of Cell Cycle Genes in Aneurysmal Subarachnoid Hemorrhage**

Elina Nikkola, Azim Laiwalla, Arthur Ko, Marcus Alvarez, Mark Connolly, Yinn Cher Ooi, William Hsu, Alex Bui, Päivi Pajukanta, and Nestor Gonzalez

## Supplemental Tables

Table I. The 451 differentially expressed genes passing FDR&lt;0.05. The results shown here are from DESeq2 R-package.

| Gene          | Mean  | log2FC | Stat  | B-H Adjusted p-value  |
|---------------|-------|--------|-------|-----------------------|
| HTRA1         | 98    | -1.28  | -6.73 | 2.47x10 <sup>-7</sup> |
| MYB           | 121   | 0.96   | 6.23  | 3.38x10 <sup>-6</sup> |
| HRH4          | 123   | 0.92   | 5.98  | 1.09x10 <sup>-5</sup> |
| MAK           | 621   | -0.70  | -5.93 | 1.10x10 <sup>-5</sup> |
| MYO7A         | 177   | -1.00  | -5.80 | 1.61x10 <sup>-5</sup> |
| OLR1          | 136   | 1.19   | 5.82  | 1.61x10 <sup>-5</sup> |
| CRISP3        | 394   | 1.13   | 5.66  | 2.93x10 <sup>-5</sup> |
| FBN1          | 27    | 0.94   | 5.65  | 2.93x10 <sup>-5</sup> |
| CD52          | 2032  | 0.63   | 5.33  | 1.46x10 <sup>-4</sup> |
| RSAD2         | 1025  | 1.07   | 5.19  | 2.68x10 <sup>-4</sup> |
| SERPINB10     | 108   | 1.01   | 5.13  | 3.24x10 <sup>-4</sup> |
| STAT5B        | 13869 | -0.43  | -5.04 | 4.74x10 <sup>-4</sup> |
| SUFU          | 566   | -0.41  | -5.04 | 4.74x10 <sup>-4</sup> |
| MRVII         | 2714  | -0.72  | -5.00 | 5.38x10 <sup>-4</sup> |
| BCL2L15       | 74    | 0.93   | 4.95  | 6.44x10 <sup>-4</sup> |
| SSH1          | 2477  | -0.49  | -4.92 | 7.15x10 <sup>-4</sup> |
| IDO1          | 98    | 1.00   | 4.88  | 8.44x10 <sup>-4</sup> |
| ANLN          | 39    | 0.91   | 4.85  | 8.96x10 <sup>-4</sup> |
| DNAH17        | 1640  | -0.56  | -4.85 | 8.96x10 <sup>-4</sup> |
| TGFBI         | 3328  | -0.66  | -4.83 | 9.26x10 <sup>-4</sup> |
| HAUS4         | 1226  | -0.57  | -4.80 | 9.70x10 <sup>-4</sup> |
| RP11-473M20.5 | 362   | -0.79  | -4.81 | 9.70x10 <sup>-4</sup> |
| MANSC1        | 2500  | -0.68  | -4.78 | 1.03x10 <sup>-3</sup> |
| MS4A3         | 355   | 0.97   | 4.76  | 1.12x10 <sup>-3</sup> |
| RP5-968J1.1   | 49    | -0.73  | -4.75 | 1.15x10 <sup>-3</sup> |
| ETS2          | 2895  | -0.65  | -4.72 | 1.20x10 <sup>-3</sup> |
| P2RY14        | 230   | 0.86   | 4.72  | 1.20x10 <sup>-3</sup> |
| ATP2B4        | 3792  | -0.57  | -4.69 | 1.36x10 <sup>-3</sup> |
| BRIP1         | 26    | 0.79   | 4.66  | 1.52x10 <sup>-3</sup> |
| CD163         | 2193  | -0.78  | -4.60 | 1.97x10 <sup>-3</sup> |
| ACSL1         | 40710 | -0.65  | -4.58 | 2.14x10 <sup>-3</sup> |
| RP11-1D12.2   | 26    | 0.93   | 4.57  | 2.19x10 <sup>-3</sup> |
| FAM129A       | 19351 | -0.55  | -4.54 | 2.28x10 <sup>-3</sup> |
| NT5DC4        | 71    | -0.77  | -4.55 | 2.28x10 <sup>-3</sup> |
| ADAM19        | 4928  | -0.48  | -4.54 | 2.32x10 <sup>-3</sup> |
| DGKD          | 4162  | -0.38  | -4.52 | 2.40x10 <sup>-3</sup> |
| ABCA2         | 2913  | -0.48  | -4.50 | 2.56x10 <sup>-3</sup> |
| HINT1         | 540   | 0.54   | 4.46  | 2.91x10 <sup>-3</sup> |
| TRIM7         | 122   | -0.64  | -4.45 | 2.94x10 <sup>-3</sup> |
| PIWIL4        | 117   | 0.63   | 4.45  | 2.96x10 <sup>-3</sup> |
| ST14          | 819   | -0.67  | -4.44 | 2.96x10 <sup>-3</sup> |

|               |      |       |       |                       |
|---------------|------|-------|-------|-----------------------|
| IFI44L        | 357  | 0.90  | 4.43  | 3.00x10 <sup>-3</sup> |
| C9orf123      | 134  | 0.56  | 4.38  | 3.66x10 <sup>-3</sup> |
| CASC5         | 57   | 0.78  | 4.38  | 3.66x10 <sup>-3</sup> |
| CYP1B1-AS1    | 76   | -0.73 | -4.36 | 3.93x10 <sup>-3</sup> |
| AL137145.1    | 205  | -0.70 | -4.35 | 3.98x10 <sup>-3</sup> |
| FUT4          | 360  | 0.45  | 4.35  | 3.98x10 <sup>-3</sup> |
| MKNK1         | 4681 | -0.44 | -4.33 | 4.17x10 <sup>-3</sup> |
| NUCB2         | 302  | 0.58  | 4.33  | 4.17x10 <sup>-3</sup> |
| INHBA         | 20   | 0.88  | 4.32  | 4.30x10 <sup>-3</sup> |
| AC061992.1    | 192  | -0.63 | -4.31 | 4.30x10 <sup>-3</sup> |
| CCNJL         | 2099 | -0.70 | -4.30 | 4.30x10 <sup>-3</sup> |
| GBP4          | 1456 | 0.80  | 4.30  | 4.30x10 <sup>-3</sup> |
| MAD2L1        | 35   | 0.75  | 4.31  | 4.30x10 <sup>-3</sup> |
| STAB1         | 3278 | -0.61 | -4.30 | 4.32x10 <sup>-3</sup> |
| BMF           | 1012 | -0.33 | -4.27 | 4.65x10 <sup>-3</sup> |
| MRPL32        | 137  | 0.50  | 4.27  | 4.65x10 <sup>-3</sup> |
| PLK4          | 27   | 0.73  | 4.27  | 4.65x10 <sup>-3</sup> |
| ACAT1         | 184  | 0.46  | 4.26  | 4.76x10 <sup>-3</sup> |
| RP11-704M14.1 | 75   | 0.87  | 4.25  | 4.93x10 <sup>-3</sup> |
| ACOT11        | 37   | 0.63  | 4.23  | 4.98x10 <sup>-3</sup> |
| CLMN          | 1191 | -0.44 | -4.23 | 4.98x10 <sup>-3</sup> |
| CMPK2         | 431  | 0.80  | 4.23  | 4.98x10 <sup>-3</sup> |
| IFI44         | 544  | 0.84  | 4.24  | 4.98x10 <sup>-3</sup> |
| SKA2          | 133  | 0.52  | 4.24  | 4.98x10 <sup>-3</sup> |
| RFX2          | 2047 | -0.61 | -4.23 | 4.99x10 <sup>-3</sup> |
| BATF2         | 224  | 0.81  | 4.20  | 5.27x10 <sup>-3</sup> |
| RP11-443B7.1  | 198  | -0.57 | -4.21 | 5.27x10 <sup>-3</sup> |
| RP11-473M20.7 | 5443 | -0.55 | -4.21 | 5.27x10 <sup>-3</sup> |
| AL353791.1    | 104  | -0.67 | -4.19 | 5.40x10 <sup>-3</sup> |
| FABP6         | 74   | -0.80 | -4.18 | 5.53x10 <sup>-3</sup> |
| CES1          | 755  | -0.71 | -4.17 | 5.57x10 <sup>-3</sup> |
| ETV7          | 89   | 0.86  | 4.18  | 5.57x10 <sup>-3</sup> |
| MRPL13        | 60   | 0.55  | 4.18  | 5.57x10 <sup>-3</sup> |
| NLRP12        | 4658 | -0.46 | -4.17 | 5.57x10 <sup>-3</sup> |
| WDHD1         | 41   | 0.66  | 4.17  | 5.57x10 <sup>-3</sup> |
| POLE2         | 25   | 0.71  | 4.14  | 6.04x10 <sup>-3</sup> |
| COL17A1       | 101  | 0.85  | 4.13  | 6.17x10 <sup>-3</sup> |
| KIAA1524      | 34   | 0.70  | 4.14  | 6.17x10 <sup>-3</sup> |
| WDR76         | 98   | 0.60  | 4.11  | 6.65x10 <sup>-3</sup> |
| RNASE4        | 146  | -0.55 | -4.11 | 6.72x10 <sup>-3</sup> |
| SMTNL1        | 207  | 0.79  | 4.11  | 6.72x10 <sup>-3</sup> |
| GBP5          | 3964 | 0.79  | 4.09  | 7.18x10 <sup>-3</sup> |
| ATP8B4        | 407  | 0.57  | 4.08  | 7.27x10 <sup>-3</sup> |
| CCDC64B       | 151  | -0.81 | -4.08 | 7.27x10 <sup>-3</sup> |
| ELMO2         | 1763 | -0.35 | -4.07 | 7.46x10 <sup>-3</sup> |
| SLFN13        | 409  | 0.49  | 4.06  | 7.71x10 <sup>-3</sup> |

|                |       |       |       |                       |
|----------------|-------|-------|-------|-----------------------|
| ABCA13         | 197   | 0.83  | 4.05  | 8.00x10 <sup>-3</sup> |
| SNRPG          | 103   | 0.65  | 4.05  | 8.00x10 <sup>-3</sup> |
| CCT2           | 429   | 0.45  | 4.04  | 8.14x10 <sup>-3</sup> |
| ATP2C2         | 77    | 0.78  | 4.02  | 8.46x10 <sup>-3</sup> |
| SLC7A7         | 3945  | -0.52 | -4.03 | 8.46x10 <sup>-3</sup> |
| TAF9           | 229   | 0.45  | 4.00  | 9.10x10 <sup>-3</sup> |
| HMOX1          | 1708  | -0.51 | -4.00 | 9.24x10 <sup>-3</sup> |
| FANCI          | 196   | 0.50  | 3.99  | 9.39x10 <sup>-3</sup> |
| KIF15          | 24    | 0.76  | 3.99  | 9.39x10 <sup>-3</sup> |
| RP11-1334A24.6 | 556   | -0.52 | -3.99 | 9.39x10 <sup>-3</sup> |
| FAM53C         | 5007  | -0.43 | -3.98 | 9.66x10 <sup>-3</sup> |
| RNASE3         | 701   | 0.81  | 3.97  | 9.66x10 <sup>-3</sup> |
| VSIG4          | 299   | -0.79 | -3.97 | 9.66x10 <sup>-3</sup> |
| GFI1           | 218   | 0.65  | 3.97  | 9.71x10 <sup>-3</sup> |
| AREL1          | 2588  | -0.33 | -3.96 | 1.02x10 <sup>-2</sup> |
| PI4K2B         | 275   | 0.54  | 3.95  | 1.02x10 <sup>-2</sup> |
| KIF1B          | 2186  | -0.43 | -3.95 | 1.03x10 <sup>-2</sup> |
| KIAA0101       | 37    | 0.81  | 3.94  | 1.06x10 <sup>-2</sup> |
| HELLS          | 72    | 0.66  | 3.93  | 1.08x10 <sup>-2</sup> |
| SIRPA          | 13345 | -0.47 | -3.93 | 1.09x10 <sup>-2</sup> |
| CLC            | 1257  | 0.79  | 3.92  | 1.11x10 <sup>-2</sup> |
| KDM4B          | 5004  | -0.42 | -3.92 | 1.11x10 <sup>-2</sup> |
| THBS4          | 49    | 0.55  | 3.92  | 1.11x10 <sup>-2</sup> |
| TNFSF14        | 1975  | -0.38 | -3.92 | 1.11x10 <sup>-2</sup> |
| MAML3          | 738   | -0.49 | -3.91 | 1.13x10 <sup>-2</sup> |
| GBP1           | 2308  | 0.76  | 3.90  | 1.16x10 <sup>-2</sup> |
| ERG            | 63    | 0.80  | 3.89  | 1.19x10 <sup>-2</sup> |
| FAM136A        | 221   | 0.30  | 3.88  | 1.19x10 <sup>-2</sup> |
| RP11-701P16.2  | 113   | -0.65 | -3.89 | 1.19x10 <sup>-2</sup> |
| SAMD4A         | 72    | 0.63  | 3.88  | 1.19x10 <sup>-2</sup> |
| KB-1208A12.3   | 93    | 0.38  | 3.88  | 1.20x10 <sup>-2</sup> |
| PFKFB3         | 6018  | -0.58 | -3.87 | 1.20x10 <sup>-2</sup> |
| PRC1           | 90    | 0.62  | 3.88  | 1.20x10 <sup>-2</sup> |
| CR1            | 6177  | -0.52 | -3.86 | 1.25x10 <sup>-2</sup> |
| FBXO4          | 60    | 0.56  | 3.86  | 1.25x10 <sup>-2</sup> |
| DLGAP5         | 28    | 0.79  | 3.86  | 1.26x10 <sup>-2</sup> |
| EAF2           | 48    | 0.72  | 3.84  | 1.32x10 <sup>-2</sup> |
| HDAC4          | 2592  | -0.37 | -3.84 | 1.32x10 <sup>-2</sup> |
| NCAPG          | 41    | 0.75  | 3.84  | 1.32x10 <sup>-2</sup> |
| PLXDC2         | 1377  | -0.45 | -3.84 | 1.32x10 <sup>-2</sup> |
| SIRPB2         | 4171  | -0.45 | -3.84 | 1.32x10 <sup>-2</sup> |
| EPSTI1         | 599   | 0.74  | 3.83  | 1.33x10 <sup>-2</sup> |
| HPN            | 19    | -0.74 | -3.83 | 1.33x10 <sup>-2</sup> |
| IL1R1          | 1115  | -0.52 | -3.83 | 1.33x10 <sup>-2</sup> |
| LAMC1          | 134   | -0.53 | -3.83 | 1.33x10 <sup>-2</sup> |
| TGFA           | 959   | -0.51 | -3.83 | 1.33x10 <sup>-2</sup> |

|               |       |       |       |                       |
|---------------|-------|-------|-------|-----------------------|
| APLP2         | 13367 | -0.41 | -3.82 | 1.33x10 <sup>-2</sup> |
| CEP55         | 29    | 0.78  | 3.82  | 1.33x10 <sup>-2</sup> |
| PPARG         | 25    | -0.73 | -3.82 | 1.35x10 <sup>-2</sup> |
| CIT           | 46    | 0.75  | 3.81  | 1.35x10 <sup>-2</sup> |
| CTSG          | 1261  | 0.74  | 3.81  | 1.35x10 <sup>-2</sup> |
| ARHGAP19      | 870   | -0.31 | -3.81 | 1.38x10 <sup>-2</sup> |
| KIF13A        | 1756  | -0.48 | -3.80 | 1.38x10 <sup>-2</sup> |
| SSH2          | 13437 | -0.44 | -3.80 | 1.38x10 <sup>-2</sup> |
| PPT1          | 7521  | -0.38 | -3.80 | 1.38x10 <sup>-2</sup> |
| NSMCE2        | 92    | 0.52  | 3.79  | 1.41x10 <sup>-2</sup> |
| TLR5          | 1668  | -0.50 | -3.79 | 1.43x10 <sup>-2</sup> |
| CNTNAP3       | 1973  | -0.66 | -3.79 | 1.44x10 <sup>-2</sup> |
| AC108004.3    | 27    | 0.63  | 3.78  | 1.45x10 <sup>-2</sup> |
| CDCA7         | 59    | 0.61  | 3.78  | 1.45x10 <sup>-2</sup> |
| MMP14         | 124   | -0.55 | -3.77 | 1.45x10 <sup>-2</sup> |
| MRPL1         | 38    | 0.60  | 3.77  | 1.45x10 <sup>-2</sup> |
| AMPH          | 63    | -0.74 | -3.77 | 1.47x10 <sup>-2</sup> |
| MGAM          | 14190 | -0.64 | -3.77 | 1.47x10 <sup>-2</sup> |
| FAM219A       | 584   | -0.30 | -3.76 | 1.51x10 <sup>-2</sup> |
| IFIT1         | 1092  | 0.76  | 3.76  | 1.51x10 <sup>-2</sup> |
| NIF3L1        | 166   | 0.35  | 3.76  | 1.51x10 <sup>-2</sup> |
| SLC2A9        | 176   | -0.40 | -3.75 | 1.55x10 <sup>-2</sup> |
| HIP1          | 2520  | -0.44 | -3.74 | 1.60x10 <sup>-2</sup> |
| SLC2A5        | 220   | 0.75  | 3.74  | 1.60x10 <sup>-2</sup> |
| CENPE         | 33    | 0.74  | 3.73  | 1.61x10 <sup>-2</sup> |
| KDM6B         | 12490 | -0.52 | -3.73 | 1.62x10 <sup>-2</sup> |
| IL4R          | 10554 | -0.49 | -3.73 | 1.64x10 <sup>-2</sup> |
| ARHGEF11      | 3609  | -0.42 | -3.72 | 1.64x10 <sup>-2</sup> |
| CENPF         | 76    | 0.73  | 3.72  | 1.64x10 <sup>-2</sup> |
| AC004069.2    | 81    | -0.61 | -3.72 | 1.66x10 <sup>-2</sup> |
| LINC00482     | 120   | -0.61 | -3.72 | 1.66x10 <sup>-2</sup> |
| LRP1          | 3913  | -0.55 | -3.72 | 1.66x10 <sup>-2</sup> |
| AATK          | 4392  | -0.47 | -3.70 | 1.75x10 <sup>-2</sup> |
| ZFP36         | 10959 | -0.41 | -3.70 | 1.76x10 <sup>-2</sup> |
| DUSP1         | 9605  | -0.62 | -3.70 | 1.77x10 <sup>-2</sup> |
| NFIL3         | 2422  | -0.47 | -3.69 | 1.77x10 <sup>-2</sup> |
| RP11-20B24.7  | 183   | -0.49 | -3.69 | 1.79x10 <sup>-2</sup> |
| SH3PXD2B      | 114   | -0.70 | -3.69 | 1.79x10 <sup>-2</sup> |
| RP11-76E17.4  | 36    | -0.74 | -3.69 | 1.79x10 <sup>-2</sup> |
| DKFZP667F0711 | 113   | -0.63 | -3.68 | 1.81x10 <sup>-2</sup> |
| TNS3          | 591   | -0.47 | -3.68 | 1.84x10 <sup>-2</sup> |
| YEATS4        | 84    | 0.50  | 3.67  | 1.87x10 <sup>-2</sup> |
| PC            | 87    | -0.51 | -3.66 | 1.90x10 <sup>-2</sup> |
| MTMR3         | 7364  | -0.38 | -3.66 | 1.91x10 <sup>-2</sup> |
| MERTK         | 138   | -0.59 | -3.66 | 1.91x10 <sup>-2</sup> |
| AC091878.1    | 107   | -0.56 | -3.65 | 1.95x10 <sup>-2</sup> |

|               |       |       |       |                       |
|---------------|-------|-------|-------|-----------------------|
| RP11-1137G4.3 | 34    | 0.72  | 3.65  | 1.95x10 <sup>-2</sup> |
| SVIP          | 235   | 0.59  | 3.65  | 1.95x10 <sup>-2</sup> |
| KIF11         | 107   | 0.55  | 3.63  | 2.09x10 <sup>-2</sup> |
| CHST15        | 9082  | -0.46 | -3.63 | 2.11x10 <sup>-2</sup> |
| UGT2B11       | 22    | 0.75  | 3.62  | 2.11x10 <sup>-2</sup> |
| NFKBIA        | 4244  | -0.48 | -3.62 | 2.12x10 <sup>-2</sup> |
| DAB2          | 322   | -0.47 | -3.61 | 2.15x10 <sup>-2</sup> |
| HRH2          | 2346  | -0.53 | -3.61 | 2.15x10 <sup>-2</sup> |
| PPP1R3B       | 4579  | -0.50 | -3.62 | 2.15x10 <sup>-2</sup> |
| RAB44         | 280   | 0.52  | 3.61  | 2.15x10 <sup>-2</sup> |
| TECPR2        | 4937  | -0.40 | -3.61 | 2.15x10 <sup>-2</sup> |
| ALOX15B       | 51    | -0.75 | -3.61 | 2.15x10 <sup>-2</sup> |
| CXCR2         | 47021 | -0.57 | -3.61 | 2.15x10 <sup>-2</sup> |
| GPBR          | 153   | -0.74 | -3.61 | 2.18x10 <sup>-2</sup> |
| AZU1          | 2651  | 0.72  | 3.60  | 2.20x10 <sup>-2</sup> |
| PEX3          | 68    | 0.51  | 3.60  | 2.22x10 <sup>-2</sup> |
| C2orf82       | 31    | -0.60 | -3.59 | 2.22x10 <sup>-2</sup> |
| DCAF13        | 170   | 0.39  | 3.59  | 2.22x10 <sup>-2</sup> |
| EMILIN2       | 3082  | -0.44 | -3.59 | 2.22x10 <sup>-2</sup> |
| TBL1X         | 3560  | -0.47 | -3.59 | 2.22x10 <sup>-2</sup> |
| TMEM150B      | 307   | -0.51 | -3.59 | 2.22x10 <sup>-2</sup> |
| LSM5          | 77    | 0.48  | 3.58  | 2.26x10 <sup>-2</sup> |
| TARM1         | 63    | 0.74  | 3.58  | 2.26x10 <sup>-2</sup> |
| IL6R          | 14094 | -0.41 | -3.57 | 2.32x10 <sup>-2</sup> |
| MARVELD1      | 480   | -0.61 | -3.57 | 2.32x10 <sup>-2</sup> |
| PSMA4         | 642   | 0.51  | 3.57  | 2.32x10 <sup>-2</sup> |
| RHAG          | 22    | 0.73  | 3.57  | 2.32x10 <sup>-2</sup> |
| S1PR3         | 391   | -0.54 | -3.57 | 2.32x10 <sup>-2</sup> |
| WDFY4         | 2382  | -0.35 | -3.57 | 2.32x10 <sup>-2</sup> |
| WDR61         | 267   | 0.36  | 3.57  | 2.32x10 <sup>-2</sup> |
| LAMP3         | 46    | 0.72  | 3.56  | 2.37x10 <sup>-2</sup> |
| PROK2         | 9621  | -0.54 | -3.56 | 2.37x10 <sup>-2</sup> |
| TIRAP         | 401   | -0.28 | -3.56 | 2.37x10 <sup>-2</sup> |
| TPRKB         | 74    | 0.43  | 3.56  | 2.37x10 <sup>-2</sup> |
| CDC45         | 36    | 0.73  | 3.55  | 2.38x10 <sup>-2</sup> |
| CDH26         | 65    | -0.51 | -3.55 | 2.38x10 <sup>-2</sup> |
| LINC00963     | 1937  | -0.49 | -3.55 | 2.38x10 <sup>-2</sup> |
| SUCNR1        | 20    | 0.68  | 3.55  | 2.38x10 <sup>-2</sup> |
| RP11-4F5.2    | 888   | -0.40 | -3.54 | 2.44x10 <sup>-2</sup> |
| RP11-373D23.3 | 149   | -0.56 | -3.54 | 2.45x10 <sup>-2</sup> |
| ISG15         | 1380  | 0.73  | 3.54  | 2.46x10 <sup>-2</sup> |
| GAS7          | 7416  | -0.52 | -3.53 | 2.51x10 <sup>-2</sup> |
| ATP6V1C2      | 30    | 0.60  | 3.53  | 2.51x10 <sup>-2</sup> |
| RASSF2        | 23485 | -0.39 | -3.53 | 2.54x10 <sup>-2</sup> |
| TCN1          | 688   | 0.73  | 3.53  | 2.54x10 <sup>-2</sup> |
| ZCCHC24       | 200   | -0.38 | -3.52 | 2.60x10 <sup>-2</sup> |

|               |       |       |       |                       |
|---------------|-------|-------|-------|-----------------------|
| DOCK2         | 7416  | -0.31 | -3.52 | 2.61x10 <sup>-2</sup> |
| RP11-326C3.11 | 170   | -0.42 | -3.51 | 2.69x10 <sup>-2</sup> |
| HES4          | 51    | 0.72  | 3.50  | 2.69x10 <sup>-2</sup> |
| KIF14         | 19    | 0.65  | 3.50  | 2.72x10 <sup>-2</sup> |
| CPAMD8        | 209   | -0.46 | -3.50 | 2.73x10 <sup>-2</sup> |
| PLXND1        | 1991  | -0.42 | -3.50 | 2.73x10 <sup>-2</sup> |
| VWA7          | 66    | -0.53 | -3.50 | 2.73x10 <sup>-2</sup> |
| WIPF2         | 2153  | -0.36 | -3.49 | 2.76x10 <sup>-2</sup> |
| CERS2         | 3222  | -0.33 | -3.49 | 2.77x10 <sup>-2</sup> |
| HAUS1         | 77    | 0.54  | 3.49  | 2.77x10 <sup>-2</sup> |
| TOP2A         | 111   | 0.71  | 3.49  | 2.77x10 <sup>-2</sup> |
| MMP8          | 1533  | 0.71  | 3.49  | 2.77x10 <sup>-2</sup> |
| ARHGEF40      | 5694  | -0.54 | -3.48 | 2.78x10 <sup>-2</sup> |
| ITGAD         | 57    | -0.62 | -3.48 | 2.81x10 <sup>-2</sup> |
| ADAMTS2       | 552   | -0.70 | -3.47 | 2.90x10 <sup>-2</sup> |
| CENPH         | 38    | 0.62  | 3.47  | 2.90x10 <sup>-2</sup> |
| PHF21A        | 5812  | -0.37 | -3.47 | 2.90x10 <sup>-2</sup> |
| RP11-76E17.3  | 66    | -0.67 | -3.47 | 2.90x10 <sup>-2</sup> |
| SUB1          | 677   | 0.52  | 3.46  | 2.91x10 <sup>-2</sup> |
| HSPE1         | 98    | 0.52  | 3.46  | 2.94x10 <sup>-2</sup> |
| PNPLA1        | 155   | -0.50 | -3.46 | 2.94x10 <sup>-2</sup> |
| RP3-525N10.2  | 33    | -0.68 | -3.46 | 2.94x10 <sup>-2</sup> |
| CD3D          | 476   | 0.53  | 3.43  | 3.14x10 <sup>-2</sup> |
| CEBPB         | 10987 | -0.53 | -3.44 | 3.14x10 <sup>-2</sup> |
| FAM26F        | 213   | 0.57  | 3.43  | 3.14x10 <sup>-2</sup> |
| FLT3          | 355   | -0.69 | -3.43 | 3.14x10 <sup>-2</sup> |
| IQSEC1        | 8737  | -0.36 | -3.43 | 3.14x10 <sup>-2</sup> |
| RNASEH2B      | 317   | 0.39  | 3.43  | 3.14x10 <sup>-2</sup> |
| NIPSNAP3A     | 199   | 0.39  | 3.43  | 3.14x10 <sup>-2</sup> |
| SLA           | 9171  | -0.50 | -3.43 | 3.14x10 <sup>-2</sup> |
| HERC5         | 794   | 0.69  | 3.43  | 3.14x10 <sup>-2</sup> |
| GCSAML        | 52    | 0.57  | 3.42  | 3.16x10 <sup>-2</sup> |
| PRMT5         | 750   | -0.44 | -3.43 | 3.16x10 <sup>-2</sup> |
| FBN2          | 197   | -0.53 | -3.42 | 3.16x10 <sup>-2</sup> |
| OAS3          | 2041  | 0.68  | 3.42  | 3.16x10 <sup>-2</sup> |
| PTX3          | 72    | 0.64  | 3.42  | 3.18x10 <sup>-2</sup> |
| BAIAP2        | 369   | -0.47 | -3.42 | 3.19x10 <sup>-2</sup> |
| ZWINT         | 55    | 0.67  | 3.42  | 3.19x10 <sup>-2</sup> |
| BUB3          | 917   | 0.28  | 3.41  | 3.21x10 <sup>-2</sup> |
| CYFIP1        | 1090  | -0.37 | -3.41 | 3.21x10 <sup>-2</sup> |
| IL17RA        | 19125 | -0.41 | -3.41 | 3.21x10 <sup>-2</sup> |
| IL18RAP       | 2094  | -0.56 | -3.41 | 3.21x10 <sup>-2</sup> |
| NLRP3         | 1235  | -0.48 | -3.41 | 3.21x10 <sup>-2</sup> |
| SRXN1         | 196   | -0.49 | -3.41 | 3.21x10 <sup>-2</sup> |
| STIL          | 32    | 0.64  | 3.41  | 3.21x10 <sup>-2</sup> |
| MPO           | 2413  | 0.69  | 3.41  | 3.22x10 <sup>-2</sup> |

|               |       |       |       |                       |
|---------------|-------|-------|-------|-----------------------|
| VRK1          | 122   | 0.59  | 3.40  | 3.23x10 <sup>-2</sup> |
| MRPL39        | 56    | 0.48  | 3.39  | 3.35x10 <sup>-2</sup> |
| ABAT          | 965   | -0.36 | -3.39 | 3.35x10 <sup>-2</sup> |
| CUX1          | 2758  | -0.41 | -3.39 | 3.35x10 <sup>-2</sup> |
| MBP           | 9465  | -0.42 | -3.39 | 3.38x10 <sup>-2</sup> |
| NDC80         | 55    | 0.57  | 3.39  | 3.38x10 <sup>-2</sup> |
| RTDR1         | 47    | -0.65 | -3.39 | 3.38x10 <sup>-2</sup> |
| ZSCAN18       | 211   | -0.34 | -3.39 | 3.38x10 <sup>-2</sup> |
| SVIL          | 3671  | -0.45 | -3.38 | 3.39x10 <sup>-2</sup> |
| ZNF503        | 42    | -0.46 | -3.38 | 3.39x10 <sup>-2</sup> |
| ENY2          | 316   | 0.45  | 3.38  | 3.42x10 <sup>-2</sup> |
| SLC8A1        | 955   | -0.51 | -3.38 | 3.42x10 <sup>-2</sup> |
| UGGT1         | 1942  | -0.29 | -3.38 | 3.42x10 <sup>-2</sup> |
| PRIM2         | 106   | 0.36  | 3.38  | 3.43x10 <sup>-2</sup> |
| IL5RA         | 172   | 0.59  | 3.37  | 3.51x10 <sup>-2</sup> |
| RP11-701P16.5 | 90    | -0.57 | -3.37 | 3.51x10 <sup>-2</sup> |
| CASC3         | 5745  | -0.40 | -3.36 | 3.51x10 <sup>-2</sup> |
| FOXM1         | 107   | 0.60  | 3.36  | 3.53x10 <sup>-2</sup> |
| IFIT3         | 2993  | 0.67  | 3.36  | 3.53x10 <sup>-2</sup> |
| RP11-802E16.3 | 317   | -0.37 | -3.36 | 3.53x10 <sup>-2</sup> |
| C5AR1         | 19382 | -0.45 | -3.36 | 3.54x10 <sup>-2</sup> |
| BICD2         | 3275  | -0.36 | -3.35 | 3.55x10 <sup>-2</sup> |
| C1orf115      | 79    | -0.45 | -3.35 | 3.55x10 <sup>-2</sup> |
| CEACAM6       | 578   | 0.69  | 3.35  | 3.55x10 <sup>-2</sup> |
| CEACAM8       | 1080  | 0.68  | 3.36  | 3.55x10 <sup>-2</sup> |
| ECHDC3        | 220   | -0.65 | -3.35 | 3.55x10 <sup>-2</sup> |
| RP11-298I3.1  | 96    | -0.56 | -3.35 | 3.55x10 <sup>-2</sup> |
| RPA3          | 93    | 0.49  | 3.35  | 3.60x10 <sup>-2</sup> |
| FKBP3         | 181   | 0.38  | 3.34  | 3.60x10 <sup>-2</sup> |
| MLF1IP        | 37    | 0.59  | 3.34  | 3.60x10 <sup>-2</sup> |
| DEFA3         | 19589 | 0.64  | 3.34  | 3.60x10 <sup>-2</sup> |
| DEFA4         | 2976  | 0.64  | 3.34  | 3.60x10 <sup>-2</sup> |
| DYRK4         | 91    | 0.51  | 3.34  | 3.62x10 <sup>-2</sup> |
| SORL1         | 39212 | -0.46 | -3.34 | 3.64x10 <sup>-2</sup> |
| ALDH9A1       | 1170  | -0.26 | -3.33 | 3.66x10 <sup>-2</sup> |
| BAIAP2-AS1    | 599   | -0.42 | -3.33 | 3.66x10 <sup>-2</sup> |
| EPHB2         | 91    | -0.50 | -3.33 | 3.66x10 <sup>-2</sup> |
| BPI           | 3539  | 0.67  | 3.33  | 3.72x10 <sup>-2</sup> |
| COL8A2        | 89    | -0.47 | -3.33 | 3.73x10 <sup>-2</sup> |
| RNASE1        | 114   | -0.67 | -3.33 | 3.73x10 <sup>-2</sup> |
| TADA2B        | 1680  | -0.31 | -3.32 | 3.74x10 <sup>-2</sup> |
| ARV1          | 73    | 0.36  | 3.32  | 3.75x10 <sup>-2</sup> |
| NCOA6         | 1513  | -0.30 | -3.32 | 3.75x10 <sup>-2</sup> |
| PSAT1         | 66    | 0.49  | 3.32  | 3.75x10 <sup>-2</sup> |
| RNF175        | 461   | -0.49 | -3.32 | 3.75x10 <sup>-2</sup> |
| CD1D          | 738   | -0.39 | -3.32 | 3.77x10 <sup>-2</sup> |



|               |       |       |       |                       |
|---------------|-------|-------|-------|-----------------------|
| CDCA7L        | 287   | 0.49  | 3.32  | 3.77x10 <sup>-2</sup> |
| RP11-67C2.2   | 330   | -0.45 | -3.32 | 3.78x10 <sup>-2</sup> |
| C10orf105     | 295   | -0.60 | -3.31 | 3.79x10 <sup>-2</sup> |
| ARHGAP26      | 7235  | -0.43 | -3.31 | 3.84x10 <sup>-2</sup> |
| AQP9          | 27659 | -0.41 | -3.31 | 3.86x10 <sup>-2</sup> |
| MDH1          | 490   | 0.44  | 3.30  | 3.89x10 <sup>-2</sup> |
| SS18L2        | 107   | 0.44  | 3.30  | 3.89x10 <sup>-2</sup> |
| NOTCH2        | 9263  | -0.42 | -3.30 | 3.90x10 <sup>-2</sup> |
| CTC-246B18.8  | 69    | -0.49 | -3.30 | 3.94x10 <sup>-2</sup> |
| RFC3          | 69    | 0.48  | 3.30  | 3.94x10 <sup>-2</sup> |
| RP11-181G12.2 | 171   | -0.36 | -3.30 | 3.94x10 <sup>-2</sup> |
| CDK1          | 28    | 0.68  | 3.29  | 3.96x10 <sup>-2</sup> |
| TUFT1         | 132   | -0.48 | -3.29 | 3.96x10 <sup>-2</sup> |
| C5orf56       | 725   | 0.41  | 3.29  | 4.00x10 <sup>-2</sup> |
| ESPL1         | 61    | 0.63  | 3.29  | 4.00x10 <sup>-2</sup> |
| IL10RB        | 3218  | -0.30 | -3.29 | 4.00x10 <sup>-2</sup> |
| SLC11A1       | 22240 | -0.50 | -3.29 | 4.02x10 <sup>-2</sup> |
| FBXO5         | 75    | 0.51  | 3.28  | 4.04x10 <sup>-2</sup> |
| IFT57         | 120   | 0.48  | 3.28  | 4.04x10 <sup>-2</sup> |
| KAT6A         | 3646  | -0.43 | -3.28 | 4.04x10 <sup>-2</sup> |
| KDM5B         | 1009  | -0.34 | -3.28 | 4.04x10 <sup>-2</sup> |
| KIAA0391      | 418   | 0.24  | 3.28  | 4.04x10 <sup>-2</sup> |
| NOL3          | 87    | -0.41 | -3.28 | 4.04x10 <sup>-2</sup> |
| SLC5A9        | 68    | -0.63 | -3.28 | 4.04x10 <sup>-2</sup> |
| TCF19         | 193   | 0.49  | 3.28  | 4.04x10 <sup>-2</sup> |
| DTL           | 44    | 0.67  | 3.27  | 4.04x10 <sup>-2</sup> |
| MIS18A        | 38    | 0.50  | 3.27  | 4.04x10 <sup>-2</sup> |
| ZNF608        | 207   | -0.64 | -3.27 | 4.04x10 <sup>-2</sup> |
| DHFR          | 212   | 0.42  | 3.27  | 4.04x10 <sup>-2</sup> |
| IRF2BPL       | 2936  | -0.49 | -3.27 | 4.05x10 <sup>-2</sup> |
| STMN1         | 432   | 0.62  | 3.27  | 4.07x10 <sup>-2</sup> |
| CYSLTR1       | 355   | 0.42  | 3.27  | 4.10x10 <sup>-2</sup> |
| IL1B          | 1836  | -0.45 | -3.26 | 4.10x10 <sup>-2</sup> |
| UQCRQ         | 182   | 0.50  | 3.26  | 4.12x10 <sup>-2</sup> |
| CTNNA1        | 2898  | -0.39 | -3.25 | 4.16x10 <sup>-2</sup> |
| DBN1          | 642   | -0.51 | -3.26 | 4.16x10 <sup>-2</sup> |
| FAM49A        | 2729  | -0.34 | -3.26 | 4.16x10 <sup>-2</sup> |
| RETN          | 980   | 0.67  | 3.26  | 4.16x10 <sup>-2</sup> |
| UBE4B         | 1704  | -0.33 | -3.26 | 4.16x10 <sup>-2</sup> |
| ZNF367        | 77    | 0.52  | 3.26  | 4.16x10 <sup>-2</sup> |
| SLC29A3       | 186   | -0.34 | -3.25 | 4.17x10 <sup>-2</sup> |
| CFLAR         | 14455 | -0.35 | -3.25 | 4.18x10 <sup>-2</sup> |
| PTGFRN        | 47    | -0.54 | -3.25 | 4.19x10 <sup>-2</sup> |
| ACADM         | 201   | 0.43  | 3.25  | 4.20x10 <sup>-2</sup> |
| GBGT1         | 616   | -0.43 | -3.25 | 4.20x10 <sup>-2</sup> |
| MATN2         | 27    | 0.54  | 3.25  | 4.20x10 <sup>-2</sup> |

|               |       |       |       |                       |
|---------------|-------|-------|-------|-----------------------|
| MOCS2         | 93    | 0.35  | 3.25  | 4.20x10 <sup>-2</sup> |
| SGOL2         | 40    | 0.60  | 3.24  | 4.20x10 <sup>-2</sup> |
| FOSL2         | 7657  | -0.36 | -3.24 | 4.24x10 <sup>-2</sup> |
| FANCL         | 75    | 0.52  | 3.24  | 4.25x10 <sup>-2</sup> |
| GPR97         | 10028 | -0.46 | -3.24 | 4.28x10 <sup>-2</sup> |
| PKNOX1        | 479   | -0.26 | -3.24 | 4.28x10 <sup>-2</sup> |
| WASF2         | 8791  | -0.36 | -3.24 | 4.28x10 <sup>-2</sup> |
| IGF1R         | 2866  | -0.43 | -3.23 | 4.28x10 <sup>-2</sup> |
| LTF           | 14590 | 0.63  | 3.23  | 4.28x10 <sup>-2</sup> |
| NCAPG2        | 149   | 0.48  | 3.23  | 4.28x10 <sup>-2</sup> |
| ITGAM         | 12705 | -0.44 | -3.23 | 4.29x10 <sup>-2</sup> |
| TIMM10        | 178   | 0.62  | 3.23  | 4.29x10 <sup>-2</sup> |
| ADH5          | 436   | 0.36  | 3.23  | 4.30x10 <sup>-2</sup> |
| RPSAP58       | 124   | 0.46  | 3.23  | 4.30x10 <sup>-2</sup> |
| AC007278.3    | 212   | -0.64 | -3.22 | 4.35x10 <sup>-2</sup> |
| ATP5C1        | 618   | 0.39  | 3.22  | 4.35x10 <sup>-2</sup> |
| CRISPLD2      | 4330  | -0.50 | -3.22 | 4.35x10 <sup>-2</sup> |
| ITSN1         | 199   | -0.36 | -3.22 | 4.35x10 <sup>-2</sup> |
| RP13-580F15.2 | 68    | 0.55  | 3.22  | 4.35x10 <sup>-2</sup> |
| COPS4         | 217   | 0.40  | 3.22  | 4.36x10 <sup>-2</sup> |
| CCNA2         | 68    | 0.61  | 3.21  | 4.40x10 <sup>-2</sup> |
| ZNF319        | 1121  | -0.36 | -3.21 | 4.43x10 <sup>-2</sup> |
| CIDEB         | 67    | -0.44 | -3.21 | 4.43x10 <sup>-2</sup> |
| MYLIP         | 1719  | -0.36 | -3.21 | 4.43x10 <sup>-2</sup> |
| ATXN1         | 2498  | -0.31 | -3.21 | 4.44x10 <sup>-2</sup> |
| DOK3          | 14016 | -0.47 | -3.21 | 4.44x10 <sup>-2</sup> |
| SHROOM1       | 141   | -0.52 | -3.21 | 4.44x10 <sup>-2</sup> |
| TBC1D30       | 82    | -0.47 | -3.20 | 4.45x10 <sup>-2</sup> |
| TLE4          | 2706  | -0.32 | -3.20 | 4.45x10 <sup>-2</sup> |
| ASPM          | 46    | 0.66  | 3.20  | 4.46x10 <sup>-2</sup> |
| ZNF823        | 21    | 0.59  | 3.20  | 4.46x10 <sup>-2</sup> |
| EEF1E1        | 26    | 0.54  | 3.20  | 4.47x10 <sup>-2</sup> |
| RNF144A       | 391   | 0.46  | 3.20  | 4.47x10 <sup>-2</sup> |
| SPC24         | 50    | 0.66  | 3.20  | 4.47x10 <sup>-2</sup> |
| NCOR2         | 2947  | -0.34 | -3.20 | 4.48x10 <sup>-2</sup> |
| SLC8A1-AS1    | 26    | -0.54 | -3.20 | 4.48x10 <sup>-2</sup> |
| SNX27         | 3312  | -0.33 | -3.20 | 4.49x10 <sup>-2</sup> |
| MLLT1         | 1133  | -0.33 | -3.19 | 4.50x10 <sup>-2</sup> |
| MEGF6         | 891   | -0.39 | -3.19 | 4.50x10 <sup>-2</sup> |
| ZNF746        | 3152  | -0.43 | -3.19 | 4.52x10 <sup>-2</sup> |
| BEST1         | 1992  | -0.38 | -3.19 | 4.52x10 <sup>-2</sup> |
| CBL           | 5966  | -0.36 | -3.19 | 4.52x10 <sup>-2</sup> |
| GNS           | 6114  | -0.37 | -3.19 | 4.52x10 <sup>-2</sup> |
| GPX7          | 90    | 0.42  | 3.19  | 4.52x10 <sup>-2</sup> |
| MFN2          | 4153  | -0.37 | -3.19 | 4.52x10 <sup>-2</sup> |
| RAD51         | 56    | 0.59  | 3.19  | 4.52x10 <sup>-2</sup> |

|              |       |       |       |                       |
|--------------|-------|-------|-------|-----------------------|
| RP11-344B5.2 | 224   | -0.46 | -3.19 | 4.52x10 <sup>-2</sup> |
| PYGL         | 15676 | -0.47 | -3.18 | 4.54x10 <sup>-2</sup> |
| CHEK1        | 43    | 0.56  | 3.18  | 4.55x10 <sup>-2</sup> |
| ZCCHC9       | 191   | 0.29  | 3.18  | 4.55x10 <sup>-2</sup> |
| CPSF7        | 3652  | -0.37 | -3.18 | 4.56x10 <sup>-2</sup> |
| ULK1         | 4884  | -0.39 | -3.18 | 4.57x10 <sup>-2</sup> |
| AC096772.6   | 114   | -0.34 | -3.18 | 4.60x10 <sup>-2</sup> |
| IFIT5        | 664   | 0.55  | 3.18  | 4.60x10 <sup>-2</sup> |
| RPS27L       | 136   | 0.43  | 3.18  | 4.60x10 <sup>-2</sup> |
| TYMS         | 163   | 0.64  | 3.18  | 4.60x10 <sup>-2</sup> |
| LINC00211    | 173   | -0.39 | -3.17 | 4.62x10 <sup>-2</sup> |
| NDEL1        | 3893  | -0.37 | -3.17 | 4.62x10 <sup>-2</sup> |
| CLSPN        | 44    | 0.54  | 3.17  | 4.64x10 <sup>-2</sup> |
| EZH2         | 173   | 0.46  | 3.17  | 4.64x10 <sup>-2</sup> |
| FAM71F2      | 105   | -0.48 | -3.17 | 4.64x10 <sup>-2</sup> |
| LPCAT3       | 1538  | -0.37 | -3.17 | 4.64x10 <sup>-2</sup> |
| TG           | 105   | -0.52 | -3.17 | 4.64x10 <sup>-2</sup> |
| EXOSC9       | 265   | 0.35  | 3.16  | 4.69x10 <sup>-2</sup> |
| PSMD10       | 202   | 0.36  | 3.16  | 4.70x10 <sup>-2</sup> |
| TOMM5        | 44    | 0.41  | 3.16  | 4.72x10 <sup>-2</sup> |
| LINC00593    | 37    | -0.54 | -3.16 | 4.74x10 <sup>-2</sup> |
| CXCR1        | 32208 | -0.47 | -3.16 | 4.78x10 <sup>-2</sup> |
| ITPRIP       | 3718  | -0.38 | -3.15 | 4.80x10 <sup>-2</sup> |
| NDUFA4       | 329   | 0.53  | 3.15  | 4.80x10 <sup>-2</sup> |
| PWP1         | 314   | 0.26  | 3.15  | 4.80x10 <sup>-2</sup> |
| ZNF480       | 105   | 0.38  | 3.15  | 4.80x10 <sup>-2</sup> |
| HMG1         | 1203  | 0.35  | 3.15  | 4.80x10 <sup>-2</sup> |
| MSN          | 34989 | -0.39 | -3.15 | 4.80x10 <sup>-2</sup> |
| NSMCE4A      | 260   | 0.31  | 3.15  | 4.80x10 <sup>-2</sup> |
| SEMA6A       | 35    | 0.48  | 3.15  | 4.80x10 <sup>-2</sup> |
| SSB          | 304   | 0.39  | 3.15  | 4.80x10 <sup>-2</sup> |
| TRIAP1       | 87    | 0.38  | 3.15  | 4.83x10 <sup>-2</sup> |
| PADI2        | 8617  | -0.45 | -3.15 | 4.84x10 <sup>-2</sup> |
| SLC2A3       | 16672 | -0.43 | -3.14 | 4.88x10 <sup>-2</sup> |
| HAUS2        | 224   | 0.28  | 3.14  | 4.89x10 <sup>-2</sup> |
| PSMG1        | 77    | 0.44  | 3.14  | 4.90x10 <sup>-2</sup> |
| DZIP1L       | 33    | 0.63  | 3.14  | 4.95x10 <sup>-2</sup> |
| ARNTL2       | 30    | 0.51  | 3.13  | 4.96x10 <sup>-2</sup> |
| TIPIN        | 35    | 0.47  | 3.13  | 4.97x10 <sup>-2</sup> |
| LDLRAD3      | 118   | -0.48 | -3.13 | 4.97x10 <sup>-2</sup> |
| NRG1         | 159   | -0.43 | -3.13 | 4.97x10 <sup>-2</sup> |
| ASPH         | 963   | -0.51 | -3.13 | 4.98x10 <sup>-2</sup> |

Log2FC indicates Log2 fold change; Stat indicates the results from Wald statistic; and B-H indicates P-value after Benjamini-Hochberg correction for false discovery rate.

Table II. The 164 differentially expressed genes between controls and aneurysmal SAH (aSAH) patients before and after RIC treatment.

| DESeq2        | aSAH untreated vs. treated |       |        |       |                       | untreated controls vs. untreated aSAH |       |        |       |                         | untreated controls vs. treated aSAH |       |        |       |                         |
|---------------|----------------------------|-------|--------|-------|-----------------------|---------------------------------------|-------|--------|-------|-------------------------|-------------------------------------|-------|--------|-------|-------------------------|
|               | GENE                       | Mean  | Log2FC | SE    | Stat                  | P-value                               | Mean  | Log2FC | SE    | Stat                    | P-value                             | Mean  | Log2FC | SE    | Stat                    |
| HTRA1         | 98                         | -1.28 | 0.19   | -6.73 | 2.47x10 <sup>-7</sup> | 86                                    | 2.25  | 0.27   | 8.26  | 5.00x10 <sup>-13*</sup> | 39                                  | 0.63  | 0.27   | 2.32  | 8.09x10 <sup>-2</sup>   |
| MYO7A         | 177                        | -1.00 | 0.17   | -5.80 | 1.61x10 <sup>-5</sup> | 173                                   | 1.59  | 0.20   | 7.88  | 9.69x10 <sup>-12*</sup> | 109                                 | 0.34  | 0.18   | 1.89  | 1.69x10 <sup>-1</sup>   |
| OLR1          | 136                        | 1.19  | 0.20   | 5.82  | 1.61x10 <sup>-5</sup> | 40                                    | 0.83  | 0.34   | 2.49  | 3.59x10 <sup>-2</sup>   | 118                                 | 2.44  | 0.31   | 7.89  | 4.65x10 <sup>-12*</sup> |
| CRISP3        | 394                        | 1.13  | 0.20   | 5.66  | 2.93x10 <sup>-5</sup> | 153                                   | 0.46  | 0.33   | 1.39  | 2.72x10 <sup>-1</sup>   | 369                                 | 1.85  | 0.32   | 5.80  | 7.91x10 <sup>-7*</sup>  |
| SERPINB10     | 108                        | 1.01  | 0.20   | 5.13  | 3.24x10 <sup>-4</sup> | 38                                    | 0.89  | 0.30   | 3.00  | 1.01x10 <sup>-2</sup>   | 94                                  | 2.23  | 0.30   | 7.34  | 1.26x10 <sup>-10*</sup> |
| STAT5B        | 13869                      | -0.43 | 0.08   | -5.04 | 4.74x10 <sup>-4</sup> | 14359                                 | 0.76  | 0.15   | 5.27  | 4.52x10 <sup>-6*</sup>  | 12921                               | 0.34  | 0.14   | 2.33  | 8.02x10 <sup>-2</sup>   |
| BCL2L15       | 74                         | 0.93  | 0.19   | 4.95  | 6.44x10 <sup>-4</sup> | 45                                    | 0.03  | 0.20   | 0.16  | 9.16x10 <sup>-1</sup>   | 80                                  | 1.41  | 0.24   | 5.85  | 6.46x10 <sup>-7*</sup>  |
| SSH1          | 2477                       | -0.49 | 0.10   | -4.92 | 7.15x10 <sup>-4</sup> | 2519                                  | 0.86  | 0.15   | 5.86  | 3.48x10 <sup>-7*</sup>  | 2221                                | 0.38  | 0.15   | 2.46  | 6.14x10 <sup>-2</sup>   |
| DNAH17        | 1640                       | -0.56 | 0.11   | -4.85 | 8.96x10 <sup>-4</sup> | 1412                                  | 1.45  | 0.22   | 6.56  | 1.27x10 <sup>-8*</sup>  | 1121                                | 0.84  | 0.21   | 4.02  | 1.21x10 <sup>-3</sup>   |
| ANLN          | 39                         | 0.91  | 0.19   | 4.85  | 8.96x10 <sup>-4</sup> | 21                                    | 0.64  | 0.23   | 2.73  | 2.00x10 <sup>-2</sup>   | 37                                  | 1.79  | 0.22   | 8.22  | 5.85x10 <sup>-13*</sup> |
| RP11-473M20.5 | 362                        | -0.79 | 0.16   | -4.81 | 9.70x10 <sup>-4</sup> | 394                                   | 0.99  | 0.20   | 4.95  | 1.56x10 <sup>-5*</sup>  | 298                                 | 0.07  | 0.20   | 0.35  | 8.43x10 <sup>-1</sup>   |
| HAUS4         | 1226                       | -0.57 | 0.12   | -4.80 | 9.70x10 <sup>-4</sup> | 1319                                  | 0.80  | 0.18   | 4.49  | 9.42x10 <sup>-5*</sup>  | 1119                                | 0.19  | 0.17   | 1.12  | 4.59x10 <sup>-1</sup>   |
| MANSC1        | 2500                       | -0.68 | 0.14   | -4.78 | 1.03x10 <sup>-3</sup> | 2417                                  | 1.14  | 0.18   | 6.23  | 7.17x10 <sup>-8*</sup>  | 1959                                | 0.47  | 0.20   | 2.32  | 8.12x10 <sup>-2</sup>   |
| MS4A3         | 355                        | 0.97  | 0.20   | 4.76  | 1.12x10 <sup>-3</sup> | 166                                   | 0.13  | 0.28   | 0.46  | 7.47x10 <sup>-1</sup>   | 362                                 | 1.70  | 0.28   | 6.02  | 2.63x10 <sup>-7*</sup>  |
| RP5-968J1.1   | 49                         | -0.73 | 0.15   | -4.75 | 1.15x10 <sup>-3</sup> | 49                                    | 1.15  | 0.21   | 5.51  | 1.72x10 <sup>-6*</sup>  | 37                                  | 0.33  | 0.21   | 1.61  | 2.53x10 <sup>-1</sup>   |
| ETS2          | 2895                       | -0.65 | 0.14   | -4.72 | 1.20x10 <sup>-3</sup> | 2937                                  | 1.07  | 0.18   | 5.86  | 3.48x10 <sup>-7*</sup>  | 2334                                | 0.32  | 0.17   | 1.91  | 1.65x10 <sup>-1</sup>   |
| RP11-1D12.2   | 26                         | 0.93  | 0.20   | 4.57  | 2.19x10 <sup>-3</sup> | 7                                     | 0.54  | 0.35   | 1.54  | 2.19x10 <sup>-1</sup>   | 23                                  | 2.24  | 0.32   | 6.93  | 1.45x10 <sup>-9*</sup>  |
| DGKD          | 4162                       | -0.38 | 0.08   | -4.52 | 2.40x10 <sup>-3</sup> | 4483                                  | 0.62  | 0.10   | 6.34  | 4.20x10 <sup>-8*</sup>  | 4143                                | 0.25  | 0.11   | 2.34  | 7.78x10 <sup>-2</sup>   |
| TRIM7         | 122                        | -0.64 | 0.14   | -4.45 | 2.94x10 <sup>-3</sup> | 126                                   | 0.92  | 0.15   | 6.32  | 4.48x10 <sup>-8*</sup>  | 105                                 | 0.28  | 0.17   | 1.62  | 2.52x10 <sup>-1</sup>   |
| ST14          | 819                        | -0.67 | 0.15   | -4.44 | 2.96x10 <sup>-3</sup> | 886                                   | 0.88  | 0.17   | 5.06  | 1.03x10 <sup>-5*</sup>  | 719                                 | 0.14  | 0.18   | 0.78  | 6.26x10 <sup>-1</sup>   |
| PIWIL4        | 117                        | 0.63  | 0.14   | 4.45  | 2.96x10 <sup>-3</sup> | 86                                    | 0.42  | 0.13   | 3.31  | 4.26x10 <sup>-3</sup>   | 118                                 | 1.21  | 0.16   | 7.36  | 1.06x10 <sup>-10*</sup> |
| CASC5         | 57                         | 0.78  | 0.18   | 4.38  | 3.66x10 <sup>-3</sup> | 40                                    | 0.29  | 0.20   | 1.45  | 2.47x10 <sup>-1</sup>   | 59                                  | 1.27  | 0.19   | 6.87  | 2.14x10 <sup>-9*</sup>  |
| CYP1B1-AS1    | 76                         | -0.73 | 0.17   | -4.36 | 3.93x10 <sup>-3</sup> | 75                                    | 1.23  | 0.25   | 5.01  | 1.27x10 <sup>-5*</sup>  | 54                                  | 0.34  | 0.23   | 1.47  | 3.05x10 <sup>-1</sup>   |
| AL137145.1    | 205                        | -0.70 | 0.16   | -4.35 | 3.98x10 <sup>-3</sup> | 208                                   | 1.12  | 0.19   | 5.82  | 4.24x10 <sup>-7*</sup>  | 160                                 | 0.30  | 0.19   | 1.57  | 2.68x10 <sup>-1</sup>   |
| FUT4          | 360                        | 0.45  | 0.10   | 4.35  | 3.98x10 <sup>-3</sup> | 328                                   | 0.25  | 0.07   | 3.57  | 1.98x10 <sup>-3</sup>   | 397                                 | 0.75  | 0.09   | 8.22  | 5.85x10 <sup>-13*</sup> |
| MKINK1        | 4681                       | -0.44 | 0.10   | -4.33 | 4.17x10 <sup>-3</sup> | 4460                                  | 1.01  | 0.19   | 5.20  | 5.95x10 <sup>-6*</sup>  | 3895                                | 0.54  | 0.19   | 2.91  | 2.42x10 <sup>-2</sup>   |
| INHBA         | 20                         | 0.88  | 0.20   | 4.32  | 4.30x10 <sup>-3</sup> | 8                                     | 0.75  | 0.35   | 2.14  | 7.43x10 <sup>-2</sup>   | 17                                  | 1.84  | 0.32   | 5.70  | 1.28x10 <sup>-6*</sup>  |
| AC061992.1    | 192                        | -0.63 | 0.15   | -4.31 | 4.30x10 <sup>-3</sup> | 158                                   | 1.75  | 0.24   | 7.30  | 2.81x10 <sup>-10*</sup> | 114                                 | 1.01  | 0.22   | 4.55  | 1.97x10 <sup>-4</sup>   |
| GBP4          | 1456                       | 0.80  | 0.19   | 4.30  | 4.30x10 <sup>-3</sup> | 1927                                  | -1.07 | 0.20   | -5.36 | 3.14x10 <sup>-6*</sup>  | 2517                                | 0.07  | 0.22   | 0.34  | 8.51x10 <sup>-1</sup>   |
| STAB1         | 3278                       | -0.61 | 0.14   | -4.30 | 4.32x10 <sup>-3</sup> | 3351                                  | 1.04  | 0.14   | 7.20  | 5.63x10 <sup>-10*</sup> | 2712                                | 0.32  | 0.13   | 2.50  | 5.70x10 <sup>-2</sup>   |
| BMF           | 1012                       | -0.33 | 0.08   | -4.27 | 4.65x10 <sup>-3</sup> | 1148                                  | 0.46  | 0.08   | 5.83  | 4.03x10 <sup>-7*</sup>  | 1081                                | 0.13  | 0.09   | 1.52  | 2.88x10 <sup>-1</sup>   |
| CLMN          | 1191                       | -0.44 | 0.10   | -4.23 | 4.98x10 <sup>-3</sup> | 1292                                  | 0.68  | 0.13   | 5.41  | 2.60x10 <sup>-6*</sup>  | 1155                                | 0.21  | 0.12   | 1.75  | 2.09x10 <sup>-1</sup>   |
| IFI44         | 544                        | 0.84  | 0.20   | 4.24  | 4.98x10 <sup>-3</sup> | 698                                   | -1.45 | 0.32   | -4.49 | 9.23x10 <sup>-5*</sup>  | 804                                 | -0.73 | 0.30   | -2.42 | 6.70x10 <sup>-2</sup>   |
| RFX2          | 2047                       | -0.61 | 0.14   | -4.23 | 4.99x10 <sup>-3</sup> | 1849                                  | 1.30  | 0.22   | 6.00  | 1.91x10 <sup>-7*</sup>  | 1489                                | 0.67  | 0.22   | 3.04  | 1.80x10 <sup>-2</sup>   |

|                |       |       |      |       |                       |       |       |      |       |                         |       |       |      |       |                         |
|----------------|-------|-------|------|-------|-----------------------|-------|-------|------|-------|-------------------------|-------|-------|------|-------|-------------------------|
| RP11-473M20.7  | 5443  | -0.55 | 0.13 | -4.21 | 5.27x10 <sup>-3</sup> | 5398  | 0.97  | 0.18 | 5.34  | 3.35x10 <sup>-6*</sup>  | 4601  | 0.41  | 0.19 | 2.16  | 1.08x10 <sup>-1</sup>   |
| NLRP12         | 4658  | -0.46 | 0.11 | -4.17 | 5.57x10 <sup>-3</sup> | 4797  | 0.78  | 0.16 | 4.86  | 2.29x10 <sup>-5*</sup>  | 4292  | 0.34  | 0.17 | 1.98  | 1.47x10 <sup>-1</sup>   |
| COL17A1        | 101   | 0.85  | 0.21 | 4.13  | 6.17x10 <sup>-3</sup> | 30    | 0.91  | 0.26 | 3.48  | 2.63x10 <sup>-3</sup>   | 89    | 2.46  | 0.30 | 8.14  | 8.38x10 <sup>-13*</sup> |
| RNASE4         | 146   | -0.55 | 0.13 | -4.11 | 6.72x10 <sup>-3</sup> | 146   | 1.00  | 0.19 | 5.33  | 3.57x10 <sup>-6*</sup>  | 121   | 0.39  | 0.18 | 2.23  | 9.61x10 <sup>-2</sup>   |
| GBP5           | 3964  | 0.79  | 0.19 | 4.09  | 7.18x10 <sup>-3</sup> | 4980  | -1.09 | 0.23 | -4.77 | 3.13x10 <sup>-5*</sup>  | 6743  | 0.16  | 0.26 | 0.63  | 7.02x10 <sup>-1</sup>   |
| ATP8B4         | 407   | 0.57  | 0.14 | 4.08  | 7.27x10 <sup>-3</sup> | 360   | 0.17  | 0.14 | 1.19  | 3.57x10 <sup>-1</sup>   | 455   | 0.81  | 0.14 | 5.84  | 6.47x10 <sup>-7*</sup>  |
| ABCA13         | 197   | 0.83  | 0.21 | 4.05  | 8.00x10 <sup>-3</sup> | 78    | 0.81  | 0.34 | 2.38  | 4.53x10 <sup>-2</sup>   | 171   | 1.96  | 0.32 | 6.16  | 1.22x10 <sup>-7*</sup>  |
| SLC7A7         | 3945  | -0.52 | 0.13 | -4.03 | 8.46x10 <sup>-3</sup> | 4283  | 0.77  | 0.13 | 5.87  | 3.43x10 <sup>-7*</sup>  | 3684  | 0.18  | 0.12 | 1.47  | 3.05x10 <sup>-1</sup>   |
| RP11-1334A24.6 | 556   | -0.52 | 0.13 | -3.99 | 9.39x10 <sup>-3</sup> | 577   | 0.81  | 0.18 | 4.55  | 7.27x10 <sup>-5*</sup>  | 505   | 0.30  | 0.19 | 1.61  | 2.56x10 <sup>-1</sup>   |
| KIF15          | 24    | 0.76  | 0.19 | 3.99  | 9.39x10 <sup>-3</sup> | 17    | 0.13  | 0.24 | 0.57  | 6.81x10 <sup>-1</sup>   | 26    | 1.19  | 0.24 | 4.98  | 3.62x10 <sup>-5*</sup>  |
| VSIG4          | 299   | -0.79 | 0.20 | -3.97 | 9.66x10 <sup>-3</sup> | 240   | 1.94  | 0.29 | 6.78  | 4.08x10 <sup>-9*</sup>  | 109   | 0.20  | 0.23 | 0.87  | 5.80x10 <sup>-1</sup>   |
| RNASE3         | 701   | 0.81  | 0.20 | 3.97  | 9.66x10 <sup>-3</sup> | 88    | 0.64  | 0.33 | 1.97  | 1.04x10 <sup>-1</sup>   | 163   | 1.60  | 0.32 | 5.03  | 3.01x10 <sup>-5*</sup>  |
| KIAA0101       | 37    | 0.81  | 0.21 | 3.94  | 1.06x10 <sup>-3</sup> | 15    | 0.52  | 0.25 | 2.04  | 9.14x10 <sup>-2</sup>   | 35    | 1.97  | 0.28 | 7.06  | 6.74x10 <sup>-10*</sup> |
| SIRPA          | 13345 | -0.47 | 0.12 | -3.93 | 1.09x10 <sup>-3</sup> | 13087 | 0.94  | 0.18 | 5.30  | 3.99x10 <sup>-6*</sup>  | 11456 | 0.46  | 0.18 | 2.56  | 5.05x10 <sup>-2</sup>   |
| ERG            | 63    | 0.80  | 0.21 | 3.89  | 1.19x10 <sup>-2</sup> | 24    | 0.83  | 0.27 | 3.09  | 7.94x10 <sup>-3</sup>   | 55    | 2.20  | 0.28 | 7.88  | 4.65x10 <sup>-12*</sup> |
| PFKFB3         | 6018  | -0.58 | 0.15 | -3.87 | 1.20x10 <sup>-2</sup> | 4986  | 1.55  | 0.26 | 5.87  | 3.33x10 <sup>-7*</sup>  | 3844  | 0.91  | 0.26 | 3.55  | 4.91x10 <sup>-3</sup>   |
| PRC1           | 90    | 0.62  | 0.16 | 3.88  | 1.20x10 <sup>-2</sup> | 80    | -0.01 | 0.12 | -0.11 | 9.41x10 <sup>-1</sup>   | 105   | 0.79  | 0.16 | 4.99  | 3.36x10 <sup>-5*</sup>  |
| FBXO4          | 60    | 0.56  | 0.14 | 3.86  | 1.25x10 <sup>-2</sup> | 81    | -0.65 | 0.14 | -4.52 | 8.22x10 <sup>-5*</sup>  | 96    | -0.04 | 0.13 | -0.31 | 8.65x10 <sup>-1</sup>   |
| DLGAP5         | 28    | 0.79  | 0.20 | 3.86  | 1.26x10 <sup>-2</sup> | 15    | 0.56  | 0.27 | 2.08  | 8.39x10 <sup>-2</sup>   | 27    | 1.79  | 0.23 | 7.83  | 6.29x10 <sup>-12*</sup> |
| HDAC4          | 2592  | -0.37 | 0.10 | -3.84 | 1.32x10 <sup>-2</sup> | 2644  | 0.81  | 0.16 | 5.02  | 1.21x10 <sup>-5*</sup>  | 2366  | 0.38  | 0.14 | 2.73  | 3.59x10 <sup>-2</sup>   |
| NCAPG          | 41    | 0.75  | 0.20 | 3.84  | 1.32x10 <sup>-2</sup> | 26    | 0.41  | 0.23 | 1.81  | 1.41x10 <sup>-1</sup>   | 41    | 1.43  | 0.21 | 6.75  | 4.43x10 <sup>-9*</sup>  |
| HPN            | 19    | -0.74 | 0.19 | -3.83 | 1.33x10 <sup>-2</sup> | 17    | 1.68  | 0.25 | 6.64  | 8.73x10 <sup>-9*</sup>  | 11    | 0.71  | 0.26 | 2.74  | 3.46x10 <sup>-2</sup>   |
| IL1R1          | 1115  | -0.52 | 0.14 | -3.83 | 1.33x10 <sup>-2</sup> | 1038  | 1.13  | 0.21 | 5.27  | 4.47x10 <sup>-6*</sup>  | 869   | 0.58  | 0.21 | 2.73  | 3.59x10 <sup>-2</sup>   |
| LAMC1          | 134   | -0.53 | 0.14 | -3.83 | 1.33x10 <sup>-2</sup> | 144   | 0.76  | 0.15 | 5.18  | 6.56x10 <sup>-6*</sup>  | 126   | 0.21  | 0.16 | 1.28  | 3.85x10 <sup>-1</sup>   |
| CEP55          | 29    | 0.78  | 0.20 | 3.82  | 1.33x10 <sup>-2</sup> | 16    | 0.41  | 0.25 | 1.63  | 1.88x10 <sup>-1</sup>   | 29    | 1.59  | 0.24 | 6.72  | 5.24x10 <sup>-9*</sup>  |
| PPARG          | 25    | -0.73 | 0.19 | -3.82 | 1.35x10 <sup>-2</sup> | 19    | 2.13  | 0.27 | 7.85  | 9.69x10 <sup>-12*</sup> | 12    | 1.20  | 0.28 | 4.36  | 3.92x10 <sup>-4</sup>   |
| CTSG           | 1261  | 0.74  | 0.19 | 3.81  | 1.35x10 <sup>-2</sup> | 74    | 1.02  | 0.34 | 3.01  | 9.92x10 <sup>-3</sup>   | 162   | 2.03  | 0.33 | 6.21  | 9.61x10 <sup>-8*</sup>  |
| CIT            | 46    | 0.75  | 0.20 | 3.81  | 1.35x10 <sup>-2</sup> | 35    | -0.01 | 0.20 | -0.05 | 9.76x10 <sup>-1</sup>   | 52    | 1.07  | 0.19 | 5.74  | 1.03x10 <sup>-6*</sup>  |
| TLR5           | 1668  | -0.50 | 0.13 | -3.79 | 1.43x10 <sup>-2</sup> | 1515  | 1.16  | 0.23 | 5.16  | 7.00x10 <sup>-6*</sup>  | 1281  | 0.65  | 0.22 | 2.90  | 2.42x10 <sup>-2</sup>   |
| CNTNAP3        | 1973  | -0.66 | 0.17 | -3.79 | 1.44x10 <sup>-2</sup> | 1586  | 1.48  | 0.30 | 5.00  | 1.30x10 <sup>-5*</sup>  | 1265  | 0.90  | 0.30 | 2.98  | 2.04x10 <sup>-2</sup>   |
| MMP14          | 124   | -0.55 | 0.14 | -3.77 | 1.45x10 <sup>-2</sup> | 115   | 1.25  | 0.18 | 6.91  | 2.16x10 <sup>-9*</sup>  | 93    | 0.62  | 0.17 | 3.74  | 2.82x10 <sup>-3</sup>   |
| AMPH           | 63    | -0.74 | 0.20 | -3.77 | 1.47x10 <sup>-2</sup> | 53    | 1.99  | 0.27 | 7.46  | 1.16x10 <sup>-10*</sup> | 31    | 0.91  | 0.25 | 3.68  | 3.35x10 <sup>-3</sup>   |
| FAM219A        | 584   | -0.30 | 0.08 | -3.76 | 1.51x10 <sup>-2</sup> | 647   | 0.49  | 0.09 | 5.35  | 3.24x10 <sup>-6*</sup>  | 612   | 0.19  | 0.09 | 2.18  | 1.04x10 <sup>-1</sup>   |
| SLC2A5         | 220   | 0.75  | 0.20 | 3.74  | 1.60x10 <sup>-2</sup> | 97    | 0.54  | 0.22 | 2.42  | 4.19x10 <sup>-2</sup>   | 208   | 1.94  | 0.27 | 7.18  | 3.16x10 <sup>-10*</sup> |
| IL4R           | 10554 | -0.49 | 0.13 | -3.73 | 1.64x10 <sup>-2</sup> | 9961  | 1.10  | 0.19 | 5.74  | 6.00x10 <sup>-7*</sup>  | 8434  | 0.57  | 0.19 | 3.03  | 1.85x10 <sup>-2</sup>   |
| CENPF          | 76    | 0.73  | 0.20 | 3.72  | 1.64x10 <sup>-2</sup> | 57    | 0.06  | 0.20 | 0.31  | 8.30x10 <sup>-1</sup>   | 85    | 1.10  | 0.19 | 5.87  | 5.89x10 <sup>-7*</sup>  |
| LINC00482      | 120   | -0.61 | 0.16 | -3.72 | 1.66x10 <sup>-2</sup> | 108   | 1.35  | 0.22 | 6.11  | 1.17x10 <sup>-7*</sup>  | 85    | 0.67  | 0.22 | 2.99  | 2.01x10 <sup>-2</sup>   |
| AATK           | 4392  | -0.47 | 0.13 | -3.70 | 1.75x10 <sup>-2</sup> | 4274  | 0.94  | 0.15 | 6.19  | 8.69x10 <sup>-8*</sup>  | 3805  | 0.50  | 0.17 | 2.87  | 2.62x10 <sup>-2</sup>   |
| ZFP36          | 10959 | -0.41 | 0.11 | -3.70 | 1.76x10 <sup>-2</sup> | 11298 | 0.77  | 0.15 | 5.13  | 8.11x10 <sup>-6*</sup>  | 10170 | 0.35  | 0.15 | 2.35  | 7.61x10 <sup>-2</sup>   |

|               |       |       |      |       |                       |       |       |      |       |                         |       |       |      |       |                         |
|---------------|-------|-------|------|-------|-----------------------|-------|-------|------|-------|-------------------------|-------|-------|------|-------|-------------------------|
| DUSP1         | 9605  | -0.62 | 0.17 | -3.70 | 1.77x10 <sup>-2</sup> | 9807  | 1.02  | 0.19 | 5.49  | 1.83x10 <sup>-6*</sup>  | 7874  | 0.30  | 0.19 | 1.56  | 2.71x10 <sup>-1</sup>   |
| NFIL3         | 2422  | -0.47 | 0.13 | -3.69 | 1.77x10 <sup>-2</sup> | 2530  | 0.77  | 0.17 | 4.68  | 4.59x10 <sup>-5*</sup>  | 2240  | 0.30  | 0.17 | 1.71  | 2.21x10 <sup>-1</sup>   |
| RP11-20B24.7  | 183   | -0.49 | 0.13 | -3.69 | 1.79x10 <sup>-2</sup> | 168   | 1.16  | 0.18 | 6.40  | 2.91x10 <sup>-8*</sup>  | 144   | 0.65  | 0.19 | 3.45  | 6.37x10 <sup>-3</sup>   |
| SH3PXD2B      | 114   | -0.70 | 0.19 | -3.69 | 1.79x10 <sup>-2</sup> | 101   | 1.75  | 0.29 | 5.95  | 2.39x10 <sup>-7*</sup>  | 61    | 0.70  | 0.26 | 2.69  | 3.87x10 <sup>-2</sup>   |
| DKFZP667F0711 | 113   | -0.63 | 0.17 | -3.68 | 1.81x10 <sup>-2</sup> | 114   | 1.09  | 0.23 | 4.77  | 3.13x10 <sup>-5*</sup>  | 88    | 0.33  | 0.22 | 1.48  | 3.03x10 <sup>-1</sup>   |
| MTMR3         | 7364  | -0.38 | 0.10 | -3.66 | 1.91x10 <sup>-2</sup> | 7804  | 0.67  | 0.14 | 4.74  | 3.61x10 <sup>-5*</sup>  | 7138  | 0.28  | 0.14 | 1.97  | 1.49x10 <sup>-1</sup>   |
| MERTK         | 138   | -0.59 | 0.16 | -3.66 | 1.91x10 <sup>-2</sup> | 141   | 1.00  | 0.21 | 4.63  | 5.47x10 <sup>-5*</sup>  | 113   | 0.30  | 0.21 | 1.44  | 3.18x10 <sup>-1</sup>   |
| AC091878.1    | 107   | -0.56 | 0.15 | -3.65 | 1.95x10 <sup>-2</sup> | 86    | 1.58  | 0.28 | 5.71  | 6.72x10 <sup>-7*</sup>  | 67    | 0.98  | 0.27 | 3.61  | 4.10x10 <sup>-3</sup>   |
| KIF11         | 107   | 0.55  | 0.15 | 3.63  | 2.09x10 <sup>-2</sup> | 86    | 0.35  | 0.15 | 2.28  | 5.69x10 <sup>-2</sup>   | 112   | 1.01  | 0.16 | 6.16  | 1.24x10 <sup>-7*</sup>  |
| NFKBIA        | 4244  | -0.48 | 0.13 | -3.62 | 2.12x10 <sup>-2</sup> | 4186  | 0.97  | 0.14 | 7.12  | 7.27x10 <sup>-10*</sup> | 3635  | 0.46  | 0.14 | 3.24  | 1.11x10 <sup>-2</sup>   |
| TECPR2        | 4937  | -0.40 | 0.11 | -3.61 | 2.15x10 <sup>-2</sup> | 4872  | 0.85  | 0.17 | 5.10  | 8.89x10 <sup>-6*</sup>  | 4416  | 0.46  | 0.17 | 2.69  | 3.91x10 <sup>-2</sup>   |
| GPER          | 153   | -0.74 | 0.20 | -3.61 | 2.18x10 <sup>-2</sup> | 128   | 1.99  | 0.29 | 6.93  | 1.96x10 <sup>-9*</sup>  | 74    | 0.86  | 0.28 | 3.06  | 1.71x10 <sup>-2</sup>   |
| AZU1          | 2651  | 0.72  | 0.20 | 3.60  | 2.20x10 <sup>-2</sup> | 183   | 0.96  | 0.33 | 2.96  | 1.11x10 <sup>-2</sup>   | 322   | 1.72  | 0.32 | 5.36  | 6.56x10 <sup>-6*</sup>  |
| PEX3          | 68    | 0.51  | 0.14 | 3.60  | 2.22x10 <sup>-2</sup> | 102   | -0.82 | 0.13 | -6.11 | 1.18x10 <sup>-7*</sup>  | 117   | -0.26 | 0.13 | -1.94 | 1.55x10 <sup>-1</sup>   |
| TMEM150B      | 307   | -0.51 | 0.14 | -3.59 | 2.22x10 <sup>-2</sup> | 294   | 1.07  | 0.15 | 7.01  | 1.26x10 <sup>-9*</sup>  | 251   | 0.53  | 0.17 | 3.20  | 1.20x10 <sup>-2</sup>   |
| TARM1         | 63    | 0.74  | 0.21 | 3.58  | 2.26x10 <sup>-2</sup> | 14    | 1.16  | 0.30 | 3.86  | 8.05x10 <sup>-4</sup>   | 26    | 2.00  | 0.30 | 6.67  | 6.89x10 <sup>-9*</sup>  |
| MARVELD1      | 480   | -0.61 | 0.17 | -3.57 | 2.32x10 <sup>-2</sup> | 473   | 1.11  | 0.16 | 6.82  | 3.59x10 <sup>-9*</sup>  | 382   | 0.41  | 0.18 | 2.30  | 8.40x10 <sup>-2</sup>   |
| SIPR3         | 391   | -0.54 | 0.15 | -3.57 | 2.32x10 <sup>-2</sup> | 436   | 0.66  | 0.14 | 4.72  | 3.80x10 <sup>-5*</sup>  | 382   | 0.11  | 0.17 | 0.67  | 6.80x10 <sup>-1</sup>   |
| RHAG          | 22    | 0.73  | 0.21 | 3.57  | 2.32x10 <sup>-2</sup> | 12    | 0.73  | 0.33 | 2.21  | 6.52x10 <sup>-2</sup>   | 20    | 1.70  | 0.28 | 5.99  | 3.04x10 <sup>-7*</sup>  |
| LAMP3         | 46    | 0.72  | 0.20 | 3.56  | 2.37x10 <sup>-2</sup> | 68    | -1.56 | 0.28 | -5.51 | 1.67x10 <sup>-6*</sup>  | 79    | -0.66 | 0.28 | -2.34 | 7.82x10 <sup>-2</sup>   |
| PROK2         | 9621  | -0.54 | 0.15 | -3.56 | 2.37x10 <sup>-2</sup> | 8807  | 1.20  | 0.25 | 4.71  | 3.99x10 <sup>-5*</sup>  | 7119  | 0.60  | 0.25 | 2.45  | 6.30x10 <sup>-2</sup>   |
| LINC00963     | 1937  | -0.49 | 0.14 | -3.55 | 2.38x10 <sup>-2</sup> | 1822  | 1.13  | 0.17 | 6.79  | 3.97x10 <sup>-9*</sup>  | 1544  | 0.59  | 0.16 | 3.57  | 4.58x10 <sup>-3</sup>   |
| CDC45         | 36    | 0.73  | 0.21 | 3.55  | 2.38x10 <sup>-2</sup> | 13    | 0.70  | 0.26 | 2.65  | 2.42x10 <sup>-2</sup>   | 33    | 2.14  | 0.29 | 7.46  | 6.10x10 <sup>-11*</sup> |
| SUCNR1        | 20    | 0.68  | 0.19 | 3.55  | 2.38x10 <sup>-2</sup> | 12    | 0.53  | 0.23 | 2.27  | 5.71x10 <sup>-2</sup>   | 19    | 1.50  | 0.24 | 6.28  | 6.80x10 <sup>-8*</sup>  |
| RP11-373D23.3 | 149   | -0.56 | 0.16 | -3.54 | 2.45x10 <sup>-2</sup> | 137   | 1.32  | 0.24 | 5.43  | 2.37x10 <sup>-6*</sup>  | 105   | 0.60  | 0.22 | 2.76  | 3.32x10 <sup>-2</sup>   |
| GAS7          | 7416  | -0.52 | 0.15 | -3.53 | 2.51x10 <sup>-2</sup> | 6704  | 1.27  | 0.18 | 7.19  | 5.63x10 <sup>-10*</sup> | 5545  | 0.70  | 0.18 | 3.96  | 1.48x10 <sup>-3</sup>   |
| RASSF2        | 23485 | -0.39 | 0.11 | -3.53 | 2.54x10 <sup>-2</sup> | 25670 | 0.59  | 0.13 | 4.55  | 7.41x10 <sup>-5*</sup>  | 23572 | 0.20  | 0.13 | 1.50  | 2.93x10 <sup>-1</sup>   |
| TCN1          | 688   | 0.73  | 0.21 | 3.53  | 2.54x10 <sup>-2</sup> | 232   | 0.55  | 0.24 | 2.27  | 5.72x10 <sup>-2</sup>   | 372   | 1.49  | 0.26 | 5.77  | 9.20x10 <sup>-7*</sup>  |
| ZCCHC24       | 200   | -0.38 | 0.11 | -3.52 | 2.60x10 <sup>-2</sup> | 204   | 0.77  | 0.13 | 5.83  | 4.13x10 <sup>-7*</sup>  | 187   | 0.40  | 0.14 | 2.82  | 2.96x10 <sup>-2</sup>   |
| KIF14         | 19    | 0.65  | 0.19 | 3.50  | 2.72x10 <sup>-2</sup> | 12    | 0.64  | 0.27 | 2.37  | 4.61x10 <sup>-2</sup>   | 17    | 1.45  | 0.24 | 5.93  | 4.12x10 <sup>-7*</sup>  |
| TOP2A         | 111   | 0.71  | 0.20 | 3.49  | 2.77x10 <sup>-2</sup> | 72    | 0.38  | 0.25 | 1.50  | 2.31x10 <sup>-1</sup>   | 111   | 1.42  | 0.20 | 7.21  | 2.86x10 <sup>-10*</sup> |
| MMP8          | 1533  | 0.71  | 0.20 | 3.49  | 2.77x10 <sup>-2</sup> | 425   | 1.05  | 0.36 | 2.93  | 1.20x10 <sup>-2</sup>   | 1275  | 2.31  | 0.34 | 6.84  | 2.47x10 <sup>-9*</sup>  |
| ARHGEF40      | 5694  | -0.54 | 0.16 | -3.48 | 2.78x10 <sup>-2</sup> | 5390  | 1.09  | 0.20 | 5.35  | 3.33x10 <sup>-6*</sup>  | 4535  | 0.53  | 0.21 | 2.50  | 5.74x10 <sup>-2</sup>   |
| ADAMTS2       | 552   | -0.70 | 0.20 | -3.47 | 2.90x10 <sup>-2</sup> | 379   | 2.49  | 0.38 | 6.57  | 1.25x10 <sup>-8*</sup>  | 95    | 1.03  | 0.35 | 2.96  | 2.16x10 <sup>-2</sup>   |
| PHF21A        | 5812  | -0.37 | 0.11 | -3.47 | 2.90x10 <sup>-2</sup> | 5832  | 0.81  | 0.17 | 4.77  | 3.21x10 <sup>-5*</sup>  | 5288  | 0.42  | 0.17 | 2.53  | 5.41x10 <sup>-2</sup>   |
| PNPLA1        | 155   | -0.50 | 0.15 | -3.46 | 2.94x10 <sup>-2</sup> | 160   | 0.86  | 0.16 | 5.31  | 3.83x10 <sup>-6*</sup>  | 138   | 0.33  | 0.17 | 1.89  | 1.70x10 <sup>-1</sup>   |
| CEBPB         | 10987 | -0.53 | 0.16 | -3.44 | 3.14x10 <sup>-2</sup> | 10791 | 1.04  | 0.18 | 5.67  | 7.96x10 <sup>-7*</sup>  | 9016  | 0.44  | 0.19 | 2.37  | 7.38x10 <sup>-2</sup>   |
| FLT3          | 355   | -0.69 | 0.20 | -3.43 | 3.14x10 <sup>-2</sup> | 323   | 1.51  | 0.28 | 5.40  | 2.65x10 <sup>-6*</sup>  | 216   | 0.54  | 0.28 | 1.94  | 1.57x10 <sup>-1</sup>   |
| HERC5         | 794   | 0.69  | 0.20 | 3.43  | 3.14x10 <sup>-2</sup> | 1023  | -1.33 | 0.29 | -4.62 | 5.69x10 <sup>-5*</sup>  | 1205  | -0.51 | 0.29 | -1.79 | 1.97x10 <sup>-1</sup>   |

|              |       |       |      |       |                       |       |       |      |       |                        |       |       |      |       |                         |
|--------------|-------|-------|------|-------|-----------------------|-------|-------|------|-------|------------------------|-------|-------|------|-------|-------------------------|
| PTX3         | 72    | 0.64  | 0.19 | 3.42  | 3.18x10 <sup>-2</sup> | 44    | 0.41  | 0.14 | 2.85  | 1.47x10 <sup>-2</sup>  | 72    | 1.47  | 0.22 | 6.60  | 1.03x10 <sup>-8*</sup>  |
| BAIAP2       | 369   | -0.47 | 0.14 | -3.42 | 3.19x10 <sup>-2</sup> | 385   | 0.79  | 0.13 | 5.96  | 2.29x10 <sup>-7*</sup> | 340   | 0.31  | 0.15 | 2.07  | 1.26x10 <sup>-1</sup>   |
| ZWINT        | 55    | 0.67  | 0.20 | 3.42  | 3.19x10 <sup>-2</sup> | 35    | 0.32  | 0.17 | 1.86  | 1.28x10 <sup>-1</sup>  | 56    | 1.39  | 0.21 | 6.48  | 2.11x10 <sup>-8*</sup>  |
| BUB3         | 917   | 0.28  | 0.08 | 3.41  | 3.21x10 <sup>-2</sup> | 1251  | -0.42 | 0.08 | -5.46 | 2.07x10 <sup>-6*</sup> | 1372  | -0.14 | 0.07 | -1.96 | 1.52x10 <sup>-1</sup>   |
| IL17RA       | 19125 | -0.41 | 0.12 | -3.41 | 3.21x10 <sup>-2</sup> | 19771 | 0.75  | 0.16 | 4.80  | 2.87x10 <sup>-5*</sup> | 17857 | 0.34  | 0.16 | 2.11  | 1.17x10 <sup>-1</sup>   |
| SRXN1        | 196   | -0.49 | 0.14 | -3.41 | 3.21x10 <sup>-2</sup> | 192   | 0.95  | 0.20 | 4.79  | 2.95x10 <sup>-5*</sup> | 166   | 0.46  | 0.21 | 2.20  | 1.00x10 <sup>-1</sup>   |
| MPO          | 2413  | 0.69  | 0.20 | 3.41  | 3.22x10 <sup>-2</sup> | 368   | 1.05  | 0.27 | 3.87  | 7.73x10 <sup>-4</sup>  | 636   | 1.88  | 0.29 | 6.56  | 1.32x10 <sup>-8*</sup>  |
| CUX1         | 2758  | -0.41 | 0.12 | -3.39 | 3.35x10 <sup>-2</sup> | 3088  | 0.59  | 0.12 | 4.72  | 3.87x10 <sup>-5*</sup> | 2787  | 0.13  | 0.12 | 1.12  | 4.57x10 <sup>-1</sup>   |
| RTDR1        | 47    | -0.65 | 0.19 | -3.39 | 3.38x10 <sup>-2</sup> | 42    | 1.46  | 0.25 | 5.87  | 3.33x10 <sup>-7*</sup> | 31    | 0.65  | 0.25 | 2.55  | 5.08x10 <sup>-2</sup>   |
| UGGT1        | 1942  | -0.29 | 0.08 | -3.38 | 3.42x10 <sup>-2</sup> | 2746  | -0.07 | 0.08 | -0.91 | 4.93x10 <sup>-1</sup>  | 2650  | -0.37 | 0.07 | -5.38 | 5.84x10 <sup>-6*</sup>  |
| FOXN1        | 107   | 0.60  | 0.18 | 3.36  | 3.53x10 <sup>-2</sup> | 78    | 0.30  | 0.14 | 2.07  | 8.56x10 <sup>-2</sup>  | 112   | 1.17  | 0.19 | 6.16  | 1.20x10 <sup>-7*</sup>  |
| BICD2        | 3275  | -0.36 | 0.11 | -3.35 | 3.55x10 <sup>-2</sup> | 3504  | 0.62  | 0.11 | 5.64  | 9.34x10 <sup>-7*</sup> | 3257  | 0.27  | 0.12 | 2.14  | 1.12x10 <sup>-1</sup>   |
| CEACAM6      | 578   | 0.69  | 0.21 | 3.35  | 3.55x10 <sup>-2</sup> | 184   | 0.96  | 0.34 | 2.87  | 1.43x10 <sup>-2</sup>  | 493   | 2.19  | 0.33 | 6.66  | 7.37x10 <sup>-9*</sup>  |
| CEACAM8      | 1080  | 0.68  | 0.20 | 3.36  | 3.55x10 <sup>-2</sup> | 306   | 0.80  | 0.35 | 2.30  | 5.42x10 <sup>-2</sup>  | 944   | 2.20  | 0.34 | 6.55  | 1.36x10 <sup>-8*</sup>  |
| DEFA4        | 2976  | 0.64  | 0.19 | 3.34  | 3.60x10 <sup>-2</sup> | 249   | 1.26  | 0.35 | 3.57  | 1.97x10 <sup>-3</sup>  | 499   | 2.07  | 0.33 | 6.23  | 8.67x10 <sup>-8*</sup>  |
| BPI          | 3539  | 0.67  | 0.20 | 3.33  | 3.72x10 <sup>-2</sup> | 625   | 1.09  | 0.32 | 3.45  | 2.89x10 <sup>-3</sup>  | 1122  | 1.85  | 0.32 | 5.83  | 6.73x10 <sup>-7*</sup>  |
| RNASE1       | 114   | -0.67 | 0.20 | -3.33 | 3.73x10 <sup>-2</sup> | 87    | 2.40  | 0.34 | 7.06  | 1.03x10 <sup>-9*</sup> | 42    | 1.38  | 0.30 | 4.61  | 1.57x10 <sup>-4</sup>   |
| RP11-67C2.2  | 330   | -0.45 | 0.14 | -3.32 | 3.78x10 <sup>-2</sup> | 317   | 1.00  | 0.20 | 5.06  | 1.05x10 <sup>-5*</sup> | 274   | 0.51  | 0.20 | 2.62  | 4.50x10 <sup>-2</sup>   |
| CTC-246B18.8 | 69    | -0.49 | 0.15 | -3.30 | 3.94x10 <sup>-2</sup> | 74    | 0.74  | 0.15 | 4.82  | 2.64x10 <sup>-5*</sup> | 64    | 0.22  | 0.16 | 1.33  | 3.62x10 <sup>-1</sup>   |
| CDK1         | 28    | 0.68  | 0.21 | 3.29  | 3.96x10 <sup>-2</sup> | 14    | 0.50  | 0.28 | 1.77  | 1.50x10 <sup>-1</sup>  | 27    | 1.76  | 0.25 | 7.04  | 7.65x10 <sup>-10*</sup> |
| IL10RB       | 3218  | -0.30 | 0.09 | -3.29 | 4.00x10 <sup>-2</sup> | 3382  | 0.63  | 0.14 | 4.54  | 7.81x10 <sup>-5*</sup> | 3166  | 0.32  | 0.13 | 2.43  | 6.61x10 <sup>-2</sup>   |
| ESPL1        | 61    | 0.63  | 0.19 | 3.29  | 4.00x10 <sup>-2</sup> | 36    | 0.60  | 0.18 | 3.38  | 3.53x10 <sup>-3</sup>  | 58    | 1.59  | 0.22 | 7.20  | 2.91x10 <sup>-10*</sup> |
| NOL3         | 87    | -0.41 | 0.12 | -3.28 | 4.04x10 <sup>-2</sup> | 89    | 0.81  | 0.15 | 5.30  | 4.02x10 <sup>-6*</sup> | 79    | 0.35  | 0.14 | 2.56  | 5.05x10 <sup>-2</sup>   |
| ZNF608       | 207   | -0.64 | 0.19 | -3.27 | 4.04x10 <sup>-2</sup> | 182   | 1.38  | 0.29 | 4.81  | 2.78x10 <sup>-5*</sup> | 137   | 0.65  | 0.29 | 2.23  | 9.49x10 <sup>-2</sup>   |
| DTL          | 44    | 0.67  | 0.20 | 3.27  | 4.04x10 <sup>-2</sup> | 25    | 0.59  | 0.23 | 2.60  | 2.75x10 <sup>-2</sup>  | 42    | 1.69  | 0.23 | 7.40  | 8.58x10 <sup>-11*</sup> |
| DHFR         | 212   | 0.42  | 0.13 | 3.27  | 4.04x10 <sup>-2</sup> | 195   | 0.26  | 0.12 | 2.13  | 7.61x10 <sup>-2</sup>  | 233   | 0.73  | 0.12 | 6.10  | 1.67x10 <sup>-7*</sup>  |
| IRF2BPL      | 2936  | -0.49 | 0.15 | -3.27 | 4.05x10 <sup>-2</sup> | 2859  | 1.01  | 0.20 | 5.12  | 8.25x10 <sup>-6*</sup> | 2433  | 0.47  | 0.20 | 2.37  | 7.43x10 <sup>-2</sup>   |
| CYSLTR1      | 355   | 0.42  | 0.13 | 3.27  | 4.10x10 <sup>-2</sup> | 521   | -0.71 | 0.14 | -4.95 | 1.58x10 <sup>-5*</sup> | 592   | -0.22 | 0.15 | -1.46 | 3.09x10 <sup>-1</sup>   |
| GBGT1        | 616   | -0.43 | 0.13 | -3.25 | 4.20x10 <sup>-2</sup> | 602   | 0.91  | 0.15 | 6.18  | 8.92x10 <sup>-8*</sup> | 541   | 0.49  | 0.17 | 2.97  | 2.11x10 <sup>-2</sup>   |
| MOCS2        | 93    | 0.35  | 0.11 | 3.25  | 4.20x10 <sup>-2</sup> | 131   | -0.54 | 0.10 | -5.21 | 5.78x10 <sup>-6*</sup> | 146   | -0.17 | 0.10 | -1.69 | 2.26x10 <sup>-1</sup>   |
| LTF          | 14590 | 0.63  | 0.20 | 3.23  | 4.28x10 <sup>-2</sup> | 2436  | 0.71  | 0.35 | 2.04  | 9.25x10 <sup>-2</sup>  | 4541  | 1.58  | 0.33 | 4.77  | 8.36x10 <sup>-5*</sup>  |
| ITGAM        | 12705 | -0.44 | 0.14 | -3.23 | 4.29x10 <sup>-2</sup> | 12835 | 0.86  | 0.18 | 4.88  | 2.09x10 <sup>-5*</sup> | 11307 | 0.39  | 0.18 | 2.21  | 9.97x10 <sup>-2</sup>   |
| ITSN1        | 199   | -0.36 | 0.11 | -3.22 | 4.35x10 <sup>-2</sup> | 210   | 0.66  | 0.13 | 5.04  | 1.11x10 <sup>-5*</sup> | 193   | 0.29  | 0.13 | 2.21  | 9.82x10 <sup>-2</sup>   |
| CCNA2        | 68    | 0.61  | 0.19 | 3.21  | 4.40x10 <sup>-2</sup> | 53    | 0.26  | 0.19 | 1.38  | 2.75x10 <sup>-1</sup>  | 73    | 1.07  | 0.17 | 6.35  | 4.61x10 <sup>-8*</sup>  |
| ATXN1        | 2498  | -0.31 | 0.10 | -3.21 | 4.44x10 <sup>-2</sup> | 2566  | 0.70  | 0.13 | 5.21  | 5.78x10 <sup>-6*</sup> | 2392  | 0.38  | 0.13 | 2.86  | 2.65x10 <sup>-2</sup>   |
| DOK3         | 14016 | -0.47 | 0.15 | -3.21 | 4.44x10 <sup>-2</sup> | 13951 | 0.87  | 0.18 | 4.80  | 2.86x10 <sup>-5*</sup> | 12377 | 0.42  | 0.20 | 2.12  | 1.16x10 <sup>-1</sup>   |
| ASPM         | 46    | 0.66  | 0.21 | 3.20  | 4.46x10 <sup>-2</sup> | 29    | 0.43  | 0.27 | 1.57  | 2.08x10 <sup>-1</sup>  | 45    | 1.49  | 0.22 | 6.86  | 2.22x10 <sup>-9*</sup>  |
| RNF144A      | 391   | 0.46  | 0.14 | 3.20  | 4.47x10 <sup>-2</sup> | 596   | -0.85 | 0.13 | -6.34 | 4.29x10 <sup>-8*</sup> | 686   | -0.28 | 0.15 | -1.85 | 1.79x10 <sup>-1</sup>   |
| SPC24        | 50    | 0.66  | 0.21 | 3.20  | 4.47x10 <sup>-2</sup> | 19    | 0.42  | 0.23 | 1.84  | 1.32x10 <sup>-1</sup>  | 28    | 1.28  | 0.21 | 6.12  | 1.55x10 <sup>-7*</sup>  |

|         |       |       |      |       |                       |       |       |      |       |                        |       |       |      |       |                         |
|---------|-------|-------|------|-------|-----------------------|-------|-------|------|-------|------------------------|-------|-------|------|-------|-------------------------|
| RAD51   | 56    | 0.59  | 0.18 | 3.19  | 4.52x10 <sup>-2</sup> | 41    | 0.23  | 0.15 | 1.54  | 2.16x10 <sup>-1</sup>  | 60    | 1.15  | 0.20 | 5.75  | 1.01x10 <sup>-6*</sup>  |
| PYGL    | 15676 | -0.47 | 0.15 | -3.18 | 4.54x10 <sup>-2</sup> | 14316 | 1.11  | 0.21 | 5.33  | 3.50x10 <sup>-6*</sup> | 12455 | 0.65  | 0.22 | 2.97  | 2.10x10 <sup>-2</sup>   |
| CHEK1   | 43    | 0.56  | 0.18 | 3.18  | 4.55x10 <sup>-2</sup> | 36    | 0.10  | 0.14 | 0.68  | 6.21x10 <sup>-1</sup>  | 48    | 0.90  | 0.18 | 4.96  | 3.96x10 <sup>-5*</sup>  |
| TYMS    | 163   | 0.64  | 0.20 | 3.18  | 4.60x10 <sup>-2</sup> | 90    | 0.67  | 0.22 | 3.04  | 9.14x10 <sup>-3</sup>  | 151   | 1.71  | 0.23 | 7.45  | 6.25x10 <sup>-11*</sup> |
| TG      | 105   | -0.52 | 0.16 | -3.17 | 4.64x10 <sup>-2</sup> | 93    | 1.32  | 0.19 | 6.97  | 1.64x10 <sup>-9*</sup> | 76    | 0.73  | 0.20 | 3.69  | 3.29x10 <sup>-3</sup>   |
| CLSPN   | 44    | 0.54  | 0.17 | 3.17  | 4.64x10 <sup>-2</sup> | 34    | 0.46  | 0.18 | 2.61  | 2.72x10 <sup>-2</sup>  | 45    | 1.14  | 0.19 | 6.15  | 1.26x10 <sup>-7*</sup>  |
| ZNF480  | 105   | 0.38  | 0.12 | 3.15  | 4.80x10 <sup>-2</sup> | 153   | -0.63 | 0.13 | -4.95 | 1.58x10 <sup>-5*</sup> | 171   | -0.22 | 0.12 | -1.80 | 1.94x10 <sup>-1</sup>   |
| NSMCE4A | 260   | 0.31  | 0.10 | 3.15  | 4.80x10 <sup>-2</sup> | 386   | -0.62 | 0.12 | -5.10 | 8.94x10 <sup>-6*</sup> | 425   | -0.29 | 0.12 | -2.38 | 7.18x10 <sup>-2</sup>   |
| SSB     | 304   | 0.39  | 0.12 | 3.15  | 4.80x10 <sup>-2</sup> | 428   | -0.60 | 0.13 | -4.62 | 5.67x10 <sup>-5*</sup> | 484   | -0.16 | 0.13 | -1.19 | 4.21x10 <sup>-1</sup>   |
| SLC2A3  | 16672 | -0.43 | 0.14 | -3.14 | 4.88x10 <sup>-2</sup> | 15577 | 1.00  | 0.21 | 4.84  | 2.40x10 <sup>-5*</sup> | 13863 | 0.59  | 0.22 | 2.73  | 3.53x10 <sup>-2</sup>   |
| DZIP1L  | 33    | 0.63  | 0.20 | 3.14  | 4.95x10 <sup>-2</sup> | 15    | 0.94  | 0.23 | 4.13  | 3.31x10 <sup>-4</sup>  | 29    | 1.96  | 0.27 | 7.39  | 8.91x10 <sup>-11*</sup> |
| ARNTL2  | 30    | 0.51  | 0.16 | 3.13  | 4.96x10 <sup>-2</sup> | 25    | 0.33  | 0.18 | 1.77  | 1.49x10 <sup>-1</sup>  | 32    | 0.93  | 0.17 | 5.46  | 4.11x10 <sup>-6*</sup>  |
| ASPH    | 963   | -0.51 | 0.16 | -3.13 | 4.98x10 <sup>-2</sup> | 923   | 1.09  | 0.20 | 5.44  | 2.28x10 <sup>-6*</sup> | 768   | 0.50  | 0.20 | 2.49  | 5.78x10 <sup>-2</sup>   |

Log2FC indicates Log2 fold change; SE indicates standard error; Stat indicates the results from Wald statistic; and \* indicates Bonferroni corrected significant P<1.1X10<sup>-4</sup> (P<0.05/451 DE genes).



Table III. Overlap between the differentially expressed genes and differentially methylated CpG sites.

| Chr | Gene start position | Gene end position | Gene           | CpG site position | CpG site p-value      |
|-----|---------------------|-------------------|----------------|-------------------|-----------------------|
| 1   | 9101426             | 9129887           | SLC2A5         | 9100067           | 3.29x10 <sup>-3</sup> |
| 1   | 9101426             | 9129887           | SLC2A5         | 9147808           | 9.31x10 <sup>-3</sup> |
| 1   | 9101426             | 9129887           | SLC2A5         | 9243783           | 8.36x10 <sup>-4</sup> |
| 1   | 9101426             | 9129887           | SLC2A5         | 9368498           | 6.38x10 <sup>-3</sup> |
| 1   | 36197712            | 36235551          | CLSPN          | 36029011          | 2.27x10 <sup>-3</sup> |
| 1   | 47023078            | 47069966          | MKNK1          | 46956771          | 7.41x10 <sup>-3</sup> |
| 1   | 200520624           | 200589862         | KIF14          | 200512245         | 5.72x10 <sup>-3</sup> |
| 1   | 212208894           | 212278348         | DTL            | 212266836         | 3.94x10 <sup>-3</sup> |
| 1   | 214776531           | 214837914         | CENPF          | 214846563         | 4.10x10 <sup>-3</sup> |
| 1   | 223282747           | 223316624         | TLR5           | 223487288         | 5.21x10 <sup>-3</sup> |
| 2   | 7057522             | 7184309           | RNF144A        | 6922444           | 8.81x10 <sup>-3</sup> |
| 2   | 7057522             | 7184309           | RNF144A        | 7148323           | 1.56x10 <sup>-4</sup> |
| 2   | 7057522             | 7184309           | RNF144A        | 7148362           | 5.43x10 <sup>-3</sup> |
| 2   | 7057522             | 7184309           | RNF144A        | 7213398           | 2.32x10 <sup>-3</sup> |
| 2   | 102759235           | 102796334         | IL1R1          | 102647671         | 2.18x10 <sup>-3</sup> |
| 2   | 102759235           | 102796334         | IL1R1          | 102647718         | 9.45x10 <sup>-3</sup> |
| 2   | 128848753           | 128953249         | UGGT1          | 128973012         | 7.59x10 <sup>-3</sup> |
| 2   | 128848753           | 128953249         | UGGT1          | 129033961         | 2.77x10 <sup>-3</sup> |
| 2   | 128848753           | 128953249         | UGGT1          | 129037628         | 7.08x10 <sup>-3</sup> |
| 2   | 234296799           | 234380743         | DGKD           | 234093536         | 5.06x10 <sup>-3</sup> |
| 2   | 234296799           | 234380743         | DGKD           | 234394437         | 6.31x10 <sup>-3</sup> |
| 2   | 239969863           | 240322643         | HDAC4          | 239756133         | 7.05x10 <sup>-3</sup> |
| 2   | 239969863           | 240322643         | HDAC4          | 239763625         | 9.61x10 <sup>-3</sup> |
| 2   | 239969863           | 240322643         | HDAC4          | 240199099         | 9.29x10 <sup>-3</sup> |
| 2   | 239969863           | 240322643         | HDAC4          | 240302529         | 2.14x10 <sup>-3</sup> |
| 3   | 12329348            | 12475855          | PPARG          | 12110937          | 7.86x10 <sup>-3</sup> |
| 3   | 12329348            | 12475855          | PPARG          | 12482963          | 1.52x10 <sup>-3</sup> |
| 3   | 44803208            | 44894748          | KIF15          | 44902961          | 6.07x10 <sup>-3</sup> |
| 3   | 44803208            | 44894748          | KIF15          | 45106462          | 5.07x10 <sup>-3</sup> |
| 3   | 46477495            | 46505161          | LTF            | 46750030          | 9.61x10 <sup>-3</sup> |
| 3   | 52529355            | 52558511          | STAB1          | 52389151          | 7.61x10 <sup>-4</sup> |
| 3   | 52529355            | 52558511          | STAB1          | 52566526          | 7.08x10 <sup>-3</sup> |
| 3   | 71820805            | 71834357          | PROK2          | 71721378          | 2.46x10 <sup>-3</sup> |
| 3   | 71820805            | 71834357          | PROK2          | 71932814          | 8.91x10 <sup>-4</sup> |
| 4   | 89378267            | 89427319          | HERC5          | 89132710          | 5.77x10 <sup>-3</sup> |
| 5   | 17130137            | 17217156          | AC091878.1     | 16950494          | 1.59x10 <sup>-4</sup> |
| 5   | 17130137            | 17217156          | AC091878.1     | 17147134          | 7.32x10 <sup>-3</sup> |
| 5   | 171760502           | 171881527         | SH3PXD2B       | 172131183         | 3.02x10 <sup>-3</sup> |
| 5   | 172195092           | 172198203         | DUSP1          | 172131183         | 3.02x10 <sup>-3</sup> |
| 5   | 172195092           | 172198203         | DUSP1          | 172385451         | 5.69x10 <sup>-3</sup> |
| 5   | 176921996           | 176930648         | RP11-1334A24.6 | 176759081         | 9.88x10 <sup>-3</sup> |
| 5   | 176921996           | 176930648         | RP11-1334A24.6 | 176759115         | 9.71x10 <sup>-3</sup> |
| 5   | 176921996           | 176930648         | RP11-1334A24.6 | 176789620         | 5.54x10 <sup>-3</sup> |
| 5   | 176928905           | 176937427         | DOK3           | 176832034         | 9.25x10 <sup>-3</sup> |
| 5   | 176928905           | 176937427         | DOK3           | 176846745         | 5.16x10 <sup>-3</sup> |

|    |           |           |             |           |                       |
|----|-----------|-----------|-------------|-----------|-----------------------|
| 5  | 176928905 | 176937427 | DOK3        | 176859147 | 9.23x10 <sup>-3</sup> |
| 5  | 178537851 | 178772431 | ADAMTS2     | 178913356 | 9.18x10 <sup>-3</sup> |
| 6  | 49572889  | 49604587  | RHAG        | 49493945  | 8.98x10 <sup>-3</sup> |
| 6  | 49695091  | 49712150  | CRISP3      | 49493945  | 8.98x10 <sup>-3</sup> |
| 7  | 1127723   | 1133451   | GPBR        | 1095452   | 4.51x10 <sup>-3</sup> |
| 7  | 1127723   | 1133451   | GPBR        | 1338332   | 3.93x10 <sup>-3</sup> |
| 7  | 41728600  | 41742706  | INHBA       | 41502683  | 8.89x10 <sup>-3</sup> |
| 7  | 48211056  | 48687091  | ABCA13      | 48231093  | 8.56x10 <sup>-3</sup> |
| 7  | 101459183 | 101901513 | CUX1        | 101264700 | 5.74x10 <sup>-4</sup> |
| 7  | 101459183 | 101901513 | CUX1        | 101335114 | 3.86x10 <sup>-3</sup> |
| 7  | 101459183 | 101901513 | CUX1        | 101365760 | 3.77x10 <sup>-3</sup> |
| 7  | 101459183 | 101901513 | CUX1        | 101927584 | 9.25x10 <sup>-3</sup> |
| 7  | 101459183 | 101901513 | CUX1        | 102043849 | 6.68x10 <sup>-3</sup> |
| 8  | 133879204 | 134147143 | TG          | 134106571 | 9.62x10 <sup>-3</sup> |
| 8  | 133879204 | 134147143 | TG          | 134135662 | 4.07x10 <sup>-3</sup> |
| 8  | 133879204 | 134147143 | TG          | 134251022 | 4.62x10 <sup>-3</sup> |
| 9  | 34398181  | 34458568  | FAM219A     | 34181255  | 8.11x10 <sup>-3</sup> |
| 9  | 34398181  | 34458568  | FAM219A     | 34490485  | 7.13x10 <sup>-3</sup> |
| 9  | 39072763  | 39288300  | CNTNAP3     | 39033093  | 9.08x10 <sup>-3</sup> |
| 9  | 95473644  | 95527083  | BICD2       | 95233776  | 8.09x10 <sup>-3</sup> |
| 9  | 95473644  | 95527083  | BICD2       | 95413555  | 2.59x10 <sup>-3</sup> |
| 9  | 132250938 | 132275965 | LINC00963   | 132109786 | 5.17x10 <sup>-3</sup> |
| 9  | 132250938 | 132275965 | LINC00963   | 132109934 | 8.85x10 <sup>-3</sup> |
| 9  | 132250938 | 132275965 | LINC00963   | 132257756 | 7.62x10 <sup>-4</sup> |
| 9  | 132250938 | 132275965 | LINC00963   | 132357588 | 4.05x10 <sup>-3</sup> |
| 9  | 136028334 | 136039332 | GBGT1       | 136181762 | 9.36x10 <sup>-3</sup> |
| 10 | 6186842   | 6277507   | PFKFB3      | 6018769   | 7.86x10 <sup>-3</sup> |
| 10 | 45940018  | 45948569  | RP11-67C2.2 | 45817319  | 2.22x10 <sup>-4</sup> |
| 10 | 45940018  | 45948569  | RP11-67C2.2 | 45870144  | 2.69x10 <sup>-4</sup> |
| 10 | 62538088  | 62546827  | CDK1        | 62751435  | 8.54x10 <sup>-3</sup> |
| 10 | 94352824  | 94415152  | KIF11       | 94336562  | 3.24x10 <sup>-3</sup> |
| 10 | 94352824  | 94415152  | KIF11       | 94550862  | 5.01x10 <sup>-3</sup> |
| 10 | 95256368  | 95288849  | CEP55       | 95051132  | 2.50x10 <sup>-3</sup> |
| 10 | 95256368  | 95288849  | CEP55       | 95062681  | 7.38x10 <sup>-3</sup> |
| 10 | 95256368  | 95288849  | CEP55       | 95327878  | 7.25x10 <sup>-3</sup> |
| 10 | 99473464  | 99477909  | MARVELD1    | 99258396  | 9.21x10 <sup>-3</sup> |
| 10 | 99473464  | 99477909  | MARVELD1    | 99446317  | 4.06x10 <sup>-3</sup> |
| 10 | 105791045 | 105845638 | COL17A1     | 105801896 | 9.89x10 <sup>-3</sup> |
| 11 | 45950869  | 46142985  | PHF21A      | 45803411  | 4.33x10 <sup>-3</sup> |
| 11 | 76839309  | 76926286  | MYO7A       | 76796073  | 7.66x10 <sup>-3</sup> |
| 11 | 76839309  | 76926286  | MYO7A       | 76900467  | 1.02x10 <sup>-3</sup> |
| 11 | 94277016  | 94283064  | FUT4        | 94502805  | 6.06x10 <sup>-3</sup> |
| 11 | 94300473  | 94354587  | PIWIL4      | 94502805  | 6.06x10 <sup>-3</sup> |
| 12 | 2966846   | 2986321   | FOXM1       | 3053621   | 8.55x10 <sup>-3</sup> |
| 12 | 8071823   | 8088892   | SLC2A3      | 7910506   | 7.00x10 <sup>-3</sup> |
| 12 | 8071823   | 8088892   | SLC2A3      | 7979933   | 1.96x10 <sup>-3</sup> |
| 12 | 8071823   | 8088892   | SLC2A3      | 8070526   | 7.36x10 <sup>-3</sup> |

|    |           |           |               |           |                       |
|----|-----------|-----------|---------------|-----------|-----------------------|
| 12 | 10310898  | 10324790  | OLR1          | 10362476  | 3.37x10 <sup>-3</sup> |
| 12 | 12482217  | 12503169  | MANSC1        | 12388557  | 8.78x10 <sup>-3</sup> |
| 12 | 53662082  | 53687427  | ESPL1         | 53660942  | 6.75x10 <sup>-4</sup> |
| 12 | 109185694 | 109251359 | SSH1          | 109170831 | 3.43x10 <sup>-3</sup> |
| 12 | 120123594 | 120315095 | CIT           | 120398191 | 8.51x10 <sup>-3</sup> |
| 12 | 120123594 | 120315095 | CIT           | 120549925 | 8.00x10 <sup>-3</sup> |
| 13 | 28577410  | 28674729  | FLT3          | 28368126  | 9.70x10 <sup>-3</sup> |
| 13 | 28577410  | 28674729  | FLT3          | 28503059  | 1.07x10 <sup>-3</sup> |
| 13 | 28577410  | 28674729  | FLT3          | 28659295  | 4.69x10 <sup>-3</sup> |
| 14 | 23242431  | 23285101  | SLC7A7        | 23310733  | 4.64x10 <sup>-3</sup> |
| 14 | 23305741  | 23316808  | MMP14         | 23310733  | 4.64x10 <sup>-3</sup> |
| 14 | 23415436  | 23426351  | HAUS4         | 23310733  | 4.64x10 <sup>-3</sup> |
| 14 | 25042723  | 25045466  | CTSG          | 24804985  | 9.50x10 <sup>-3</sup> |
| 14 | 55614833  | 55658396  | DLGAP5        | 55584030  | 4.28x10 <sup>-3</sup> |
| 14 | 77490885  | 77495042  | IRF2BPL       | 77334528  | 5.90x10 <sup>-3</sup> |
| 14 | 77490885  | 77495042  | IRF2BPL       | 77341636  | 8.06x10 <sup>-3</sup> |
| 14 | 95648275  | 95786245  | CLMN          | 95983475  | 4.06x10 <sup>-3</sup> |
| 14 | 95648275  | 95786245  | CLMN          | 96033927  | 6.55x10 <sup>-4</sup> |
| 14 | 102829299 | 102968818 | TECPR2        | 102776206 | 3.45x10 <sup>-3</sup> |
| 14 | 102829299 | 102968818 | TECPR2        | 102781393 | 8.67x10 <sup>-3</sup> |
| 14 | 102829299 | 102968818 | TECPR2        | 103005143 | 4.60x10 <sup>-3</sup> |
| 14 | 102829299 | 102968818 | TECPR2        | 103097135 | 6.38x10 <sup>-3</sup> |
| 14 | 102829299 | 102968818 | TECPR2        | 103160813 | 9.79x10 <sup>-3</sup> |
| 15 | 40380091  | 40398639  | BMF           | 40544713  | 6.33x10 <sup>-3</sup> |
| 15 | 40380091  | 40398639  | BMF           | 40559641  | 9.19x10 <sup>-3</sup> |
| 15 | 40886446  | 40954881  | CASC5         | 41150887  | 8.20x10 <sup>-3</sup> |
| 15 | 40987326  | 41024356  | RAD51         | 41150887  | 8.20x10 <sup>-3</sup> |
| 16 | 3082482   | 3089134   | RP11-473M20.5 | 2840498   | 5.84x10 <sup>-3</sup> |
| 16 | 3082482   | 3089134   | RP11-473M20.5 | 3011066   | 8.47x10 <sup>-3</sup> |
| 16 | 3082482   | 3089134   | RP11-473M20.5 | 3065902   | 2.72x10 <sup>-3</sup> |
| 16 | 3101992   | 3109364   | RP11-473M20.7 | 3236725   | 9.36x10 <sup>-3</sup> |
| 16 | 3101992   | 3109364   | RP11-473M20.7 | 3239683   | 5.22x10 <sup>-3</sup> |
| 16 | 27325229  | 27376099  | IL4R          | 27367633  | 1.35x10 <sup>-3</sup> |
| 16 | 31271287  | 31344213  | ITGAM         | 31540544  | 7.98x10 <sup>-3</sup> |
| 16 | 67207755  | 67209640  | NOL3          | 67195610  | 2.60x10 <sup>-3</sup> |
| 17 | 9813925   | 9929623   | GAS7          | 9891114   | 1.80x10 <sup>-3</sup> |
| 17 | 38544772  | 38574202  | TOP2A         | 38584962  | 3.21x10 <sup>-3</sup> |
| 17 | 38544772  | 38574202  | TOP2A         | 38755761  | 8.44x10 <sup>-3</sup> |
| 17 | 40351194  | 40428424  | STAT5B        | 40192921  | 4.43x10 <sup>-3</sup> |
| 17 | 40351194  | 40428424  | STAT5B        | 40266545  | 1.77x10 <sup>-3</sup> |
| 17 | 56347216  | 56358296  | MPO           | 56268785  | 7.75x10 <sup>-3</sup> |
| 17 | 56347216  | 56358296  | MPO           | 56405141  | 6.24x10 <sup>-3</sup> |
| 17 | 76419777  | 76573476  | DNAH17        | 76373256  | 5.16x10 <sup>-3</sup> |
| 17 | 76422409  | 76422834  | AC061992.1    | 76373256  | 5.16x10 <sup>-3</sup> |
| 17 | 79008946  | 79091232  | BAIAP2        | 79067113  | 3.14x10 <sup>-3</sup> |
| 17 | 79091095  | 79139872  | AATK          | 79097160  | 8.14x10 <sup>-3</sup> |
| 17 | 79091095  | 79139872  | AATK          | 79163584  | 8.63x10 <sup>-3</sup> |

|    |          |          |              |          |                       |
|----|----------|----------|--------------|----------|-----------------------|
| 17 | 79276623 | 79283048 | LINC00482    | 79163584 | 8.63x10 <sup>-3</sup> |
| 17 | 79276623 | 79283048 | LINC00482    | 79350157 | 3.52x10 <sup>-3</sup> |
| 17 | 79276623 | 79283048 | LINC00482    | 79433743 | 7.86x10 <sup>-3</sup> |
| 17 | 79276623 | 79283048 | LINC00482    | 79450592 | 7.80x10 <sup>-4</sup> |
| 18 | 657603   | 673499   | TYMS         | 559877   | 8.32x10 <sup>-3</sup> |
| 18 | 657603   | 673499   | TYMS         | 904650   | 4.31x10 <sup>-3</sup> |
| 18 | 61582744 | 61602476 | SERPINB10    | 61559787 | 4.73x10 <sup>-3</sup> |
| 19 | 827830   | 832017   | AZU1         | 581656   | 5.43x10 <sup>-3</sup> |
| 19 | 827830   | 832017   | AZU1         | 770078   | 9.66x10 <sup>-3</sup> |
| 19 | 827830   | 832017   | AZU1         | 788944   | 8.25x10 <sup>-3</sup> |
| 19 | 827830   | 832017   | AZU1         | 788951   | 8.07x10 <sup>-3</sup> |
| 19 | 827830   | 832017   | AZU1         | 808617   | 1.76x10 <sup>-3</sup> |
| 19 | 827830   | 832017   | AZU1         | 823534   | 4.37x10 <sup>-3</sup> |
| 19 | 827830   | 832017   | AZU1         | 835209   | 1.61x10 <sup>-3</sup> |
| 19 | 827830   | 832017   | AZU1         | 928287   | 2.21x10 <sup>-3</sup> |
| 19 | 827830   | 832017   | AZU1         | 999969   | 5.73x10 <sup>-3</sup> |
| 19 | 827830   | 832017   | AZU1         | 1036519  | 6.03x10 <sup>-3</sup> |
| 19 | 827830   | 832017   | AZU1         | 1060664  | 3.30x10 <sup>-3</sup> |
| 19 | 827830   | 832017   | AZU1         | 1079683  | 1.73x10 <sup>-3</sup> |
| 19 | 827830   | 832017   | AZU1         | 1079726  | 8.22x10 <sup>-3</sup> |
| 19 | 827830   | 832017   | AZU1         | 1079743  | 7.55x10 <sup>-3</sup> |
| 19 | 827830   | 832017   | AZU1         | 1079745  | 9.42x10 <sup>-3</sup> |
| 19 | 827830   | 832017   | AZU1         | 1079751  | 9.46x10 <sup>-3</sup> |
| 19 | 5993174  | 6110664  | RFX2         | 5823791  | 4.74x10 <sup>-3</sup> |
| 19 | 5993174  | 6110664  | RFX2         | 6273928  | 3.29x10 <sup>-4</sup> |
| 19 | 5993174  | 6110664  | RFX2         | 6274810  | 4.50x10 <sup>-3</sup> |
| 19 | 11257830 | 11266484 | SPC24        | 11221291 | 9.46x10 <sup>-3</sup> |
| 19 | 11257830 | 11266484 | SPC24        | 11285276 | 9.11x10 <sup>-3</sup> |
| 19 | 11257830 | 11266484 | SPC24        | 11367635 | 7.42x10 <sup>-3</sup> |
| 19 | 11257830 | 11266484 | SPC24        | 11492648 | 6.28x10 <sup>-3</sup> |
| 19 | 35531409 | 35557477 | HPN          | 35490410 | 6.66x10 <sup>-3</sup> |
| 19 | 35531409 | 35557477 | HPN          | 35514655 | 6.11x10 <sup>-5</sup> |
| 19 | 35531409 | 35557477 | HPN          | 35514678 | 6.56x10 <sup>-3</sup> |
| 19 | 35531409 | 35557477 | HPN          | 35514694 | 8.94x10 <sup>-3</sup> |
| 19 | 35531409 | 35557477 | HPN          | 35569572 | 5.49x10 <sup>-3</sup> |
| 19 | 35531409 | 35557477 | HPN          | 35610338 | 6.75x10 <sup>-3</sup> |
| 19 | 39805291 | 39811498 | CTC-246B18.8 | 39575128 | 8.90x10 <sup>-5</sup> |
| 19 | 39805291 | 39811498 | CTC-246B18.8 | 39589635 | 5.93x10 <sup>-3</sup> |
| 19 | 42259427 | 42276113 | CEACAM6      | 42416578 | 5.05x10 <sup>-4</sup> |
| 19 | 52800421 | 52829180 | ZNF480       | 52956986 | 7.69x10 <sup>-3</sup> |
| 19 | 54296854 | 54327657 | NLRP12       | 54218164 | 4.68x10 <sup>-3</sup> |
| 19 | 54296854 | 54327657 | NLRP12       | 54266550 | 5.24x10 <sup>-3</sup> |
| 19 | 54296854 | 54327657 | NLRP12       | 54545252 | 2.96x10 <sup>-3</sup> |
| 19 | 54573200 | 54584634 | TARM1        | 54545252 | 2.96x10 <sup>-3</sup> |
| 19 | 54573200 | 54584634 | TARM1        | 54607111 | 3.44x10 <sup>-3</sup> |
| 19 | 55824168 | 55836708 | TMEM150B     | 55591996 | 2.24x10 <sup>-3</sup> |
| 19 | 55824168 | 55836708 | TMEM150B     | 55760810 | 6.97x10 <sup>-3</sup> |

|    |          |          |             |          |                       |
|----|----------|----------|-------------|----------|-----------------------|
| 20 | 1784662  | 1798252  | RP5-968J1.1 | 1876682  | 7.03x10 <sup>-3</sup> |
| 20 | 1874812  | 1920540  | SIRPA       | 1920583  | 4.29x10 <sup>-3</sup> |
| 20 | 4760669  | 4804291  | RASSF2      | 4969742  | 4.66x10 <sup>-3</sup> |
| 20 | 36932551 | 36965905 | BPI         | 36853042 | 3.85x10 <sup>-3</sup> |
| 20 | 48807119 | 48809227 | CEBPB       | 48572573 | 1.61x10 <sup>-3</sup> |
| 20 | 48807119 | 48809227 | CEBPB       | 48692927 | 8.98x10 <sup>-3</sup> |
| 21 | 34638664 | 34669539 | IL10RB      | 34399336 | 7.39x10 <sup>-3</sup> |
| 21 | 34638664 | 34669539 | IL10RB      | 34436976 | 5.55x10 <sup>-3</sup> |
| 21 | 34638664 | 34669539 | IL10RB      | 34436978 | 4.69x10 <sup>-3</sup> |
| 21 | 34638664 | 34669539 | IL10RB      | 34850937 | 6.38x10 <sup>-3</sup> |
| 21 | 35014783 | 35210802 | ITSN1       | 34850937 | 6.38x10 <sup>-3</sup> |
| 21 | 35014783 | 35210802 | ITSN1       | 34976656 | 1.07x10 <sup>-3</sup> |
| 21 | 35014783 | 35210802 | ITSN1       | 35219554 | 9.97x10 <sup>-3</sup> |
| 21 | 39751949 | 39956869 | ERG         | 39840765 | 9.10x10 <sup>-3</sup> |
| 22 | 19467348 | 19508135 | CDC45       | 19701472 | 6.40x10 <sup>-3</sup> |
| 22 | 23401593 | 23484241 | RTDR1       | 23362153 | 9.35x10 <sup>-3</sup> |
| 22 | 23401593 | 23484241 | RTDR1       | 23644647 | 6.97x10 <sup>-3</sup> |
| X  | 77526968 | 77583188 | CYSLTR1     | 77359794 | 8.10x10 <sup>-3</sup> |

---

Table IV. Results of the detailed reactome pathway analysis of 14 cell cycle genes. Pathways are sorted by the P-value.

| Pathway name                                                                           | Entities found | Entities total | Entities ratio        | Entities P-value      | Entities FDR          | Reactions found | Reactions total | Reactions ratio       | Submitted entities found                                     |
|----------------------------------------------------------------------------------------|----------------|----------------|-----------------------|-----------------------|-----------------------|-----------------|-----------------|-----------------------|--------------------------------------------------------------|
| Cell Cycle                                                                             | 9              | 574            | 0.059                 | $3.25 \times 10^{-8}$ | $9.88 \times 10^{-6}$ | 89              | 345             | 0.046                 | SPC24; ESPL1; CLSPN; CDC45; CENPF; FOXM1; CDK1; CENPF; RAD51 |
| Cell Cycle, Mitotic                                                                    | 7              | 496            | 0.051                 | $4.12 \times 10^{-6}$ | $6.02 \times 10^{-4}$ | 84              | 272             | 0.036                 | SPC24; ESPL1; CDC45; CENPF; FOXM1; CDK1; CENPF               |
| Polo-like kinase mediated events                                                       | 3              | 23             | 0.002                 | $5.97 \times 10^{-6}$ | $6.02 \times 10^{-4}$ | 12              | 15              | 0.002                 | CENPF; FOXM1; CENPF                                          |
| G2/M Transition                                                                        | 4              | 133            | 0.014                 | $4.30 \times 10^{-5}$ | 0.002                 | 47              | 62              | 0.008                 | CENPF; FOXM1; CDK1; CENPF                                    |
| Mitotic G2-G2/M phases                                                                 | 4              | 135            | 0.014                 | $4.56 \times 10^{-5}$ | 0.002                 | 47              | 64              | 0.009                 | CENPF; FOXM1; CDK1; CENPF                                    |
| G2/M Checkpoints                                                                       | 3              | 46             | 0.005                 | $4.67 \times 10^{-5}$ | 0.002                 | 4               | 16              | 0.002                 | CLSPN; CDC45; CDK1                                           |
| G1/S-Specific Transcription                                                            | 2              | 17             | 0.002                 | $3.19 \times 10^{-4}$ | 0.014                 | 1               | 1               | $1.33 \times 10^{-4}$ | CDC45; CDK1                                                  |
| Cyclin A/B1 associated events during G2/M transition                                   | 2              | 26             | 0.003                 | $7.39 \times 10^{-4}$ | 0.024                 | 21              | 24              | 0.003                 | FOXM1; CDK1                                                  |
| Cell Cycle Checkpoints                                                                 | 3              | 121            | 0.012                 | $7.93 \times 10^{-4}$ | 0.024                 | 4               | 38              | 0.005                 | CLSPN; CDC45; CDK1                                           |
| Resolution of Sister Chromatid Cohesion                                                | 3              | 122            | 0.013                 | $8.12 \times 10^{-4}$ | 0.024                 | 5               | 8               | 0.001                 | SPC24; CENPF; CDK1                                           |
| Mitotic Prometaphase                                                                   | 3              | 130            | 0.013                 | $9.75 \times 10^{-4}$ | 0.026                 | 7               | 13              | 0.002                 | SPC24; CENPF; CDK1                                           |
| M Phase                                                                                | 4              | 306            | 0.032                 | 0.001                 | 0.026                 | 19              | 63              | 0.008                 | SPC24; ESPL1; CENPF; CDK1                                    |
| E2F mediated regulation of DNA replication                                             | 2              | 33             | 0.003                 | 0.001                 | 0.027                 | 3               | 6               | $7.99 \times 10^{-4}$ | CDC45; CDK1                                                  |
| Activation of ATR in response to replication stress                                    | 2              | 39             | 0.004                 | 0.002                 | 0.032                 | 2               | 9               | 0.001                 | CLSPN; CDC45                                                 |
| Kinesins                                                                               | 2              | 44             | 0.005                 | 0.002                 | 0.032                 | 4               | 14              | 0.002                 | KIF15; KIF11                                                 |
| Separation of Sister Chromatids                                                        | 3              | 179            | 0.018                 | 0.002                 | 0.032                 | 4               | 8               | 0.001                 | SPC24; ESPL1; CENPF                                          |
| Mitotic Anaphase                                                                       | 3              | 193            | 0.020                 | 0.003                 | 0.032                 | 4               | 11              | 0.001                 | SPC24; ESPL1; CENPF                                          |
| Mitotic Metaphase and Anaphase                                                         | 3              | 194            | 0.020                 | 0.003                 | 0.032                 | 4               | 12              | 0.002                 | SPC24; ESPL1; CENPF                                          |
| Assembly of the RAD51-ssDNA nucleoprotein complex                                      | 1              | 5              | $5.16 \times 10^{-4}$ | 0.008                 | 0.032                 | 3               | 3               | $3.99 \times 10^{-4}$ | RAD51                                                        |
| Phosphorylation of proteins involved in the G2/M transition by Cyclin A:Cdc2 complexes | 1              | 5              | $5.16 \times 10^{-4}$ | 0.008                 | 0.032                 | 2               | 2               | $2.66 \times 10^{-4}$ | CDK1                                                         |

|                                                                                 |   |     |                       |       |       |   |    |                       |              |
|---------------------------------------------------------------------------------|---|-----|-----------------------|-------|-------|---|----|-----------------------|--------------|
| Presynaptic phase of homologous DNA pairing and strand exchange                 | 1 | 6   | 6.20x10 <sup>-4</sup> | 0.009 | 0.032 | 4 | 7  | 9.32x10 <sup>-4</sup> | RAD51        |
| G2/M DNA replication checkpoint                                                 | 1 | 7   | 7.23x10 <sup>-4</sup> | 0.011 | 0.032 | 2 | 2  | 2.66x10 <sup>-4</sup> | CDK1         |
| Homologous DNA pairing and strand exchange                                      | 1 | 7   | 7.23x10 <sup>-4</sup> | 0.011 | 0.032 | 4 | 8  | 0.001                 | RAD51        |
| Chk1/Chk2(Cds1) mediated inactivation of Cyclin B:Cdk1 complex                  | 1 | 7   | 7.23x10 <sup>-4</sup> | 0.011 | 0.032 | 1 | 5  | 6.66x10 <sup>-4</sup> | CDK1         |
| Phosphorylation of Emi1                                                         | 1 | 8   | 8.26x10 <sup>-4</sup> | 0.012 | 0.032 | 1 | 2  | 2.66x10 <sup>-4</sup> | CDK1         |
| G1/S Transition                                                                 | 2 | 113 | 0.012                 | 0.013 | 0.032 | 7 | 32 | 0.004                 | CDC45; CDK1  |
| Cyclin B2 mediated events                                                       | 1 | 9   | 9.29x10 <sup>-4</sup> | 0.014 | 0.032 | 2 | 2  | 2.66x10 <sup>-4</sup> | CDK1         |
| Activation of NIMA Kinases NEK9, NEK6, NEK7                                     | 1 | 9   | 9.29x10 <sup>-4</sup> | 0.014 | 0.032 | 1 | 4  | 5.33x10 <sup>-4</sup> | CDK1         |
| E2F-enabled inhibition of pre-replication complex formation                     | 1 | 10  | 0.001                 | 0.015 | 0.032 | 2 | 2  | 2.66x10 <sup>-4</sup> | CDK1         |
| Unwinding of DNA                                                                | 1 | 11  | 0.001                 | 0.017 | 0.032 | 1 | 4  | 5.33x10 <sup>-4</sup> | CDC45        |
| G2/M DNA damage checkpoint                                                      | 1 | 11  | 0.001                 | 0.017 | 0.032 | 1 | 7  | 9.32x10 <sup>-4</sup> | CDK1         |
| MHC class II antigen presentation                                               | 2 | 135 | 0.014                 | 0.018 | 0.032 | 1 | 23 | 0.003                 | KIF15; KIF11 |
| MASTL Facilitates Mitotic Progression                                           | 1 | 12  | 0.001                 | 0.018 | 0.032 | 1 | 4  | 5.33x10 <sup>-4</sup> | CDK1         |
| Mitotic G1-G1/S phases                                                          | 2 | 139 | 0.014                 | 0.019 | 0.032 | 8 | 53 | 0.007                 | CDC45; CDK1  |
| ERK1 activation                                                                 | 1 | 13  | 0.001                 | 0.020 | 0.032 | 1 | 6  | 7.99x10 <sup>-4</sup> | CDK1         |
| Factors involved in megakaryocyte development and platelet production           | 2 | 150 | 0.015                 | 0.022 | 0.032 | 4 | 42 | 0.006                 | KIF15; KIF11 |
| Condensation of Prometaphase Chromosomes                                        | 1 | 15  | 0.002                 | 0.023 | 0.032 | 1 | 4  | 5.33x10 <sup>-4</sup> | CDK1         |
| ERK activation                                                                  | 1 | 15  | 0.002                 | 0.023 | 0.032 | 1 | 11 | 0.001                 | CDK1         |
| Phosphorylation of the APC/C                                                    | 1 | 17  | 0.002                 | 0.026 | 0.032 | 1 | 2  | 2.66x10 <sup>-4</sup> | CDK1         |
| Golgi Cisternae Pericentriolar Stack Reorganization                             | 1 | 17  | 0.002                 | 0.026 | 0.032 | 1 | 6  | 7.99x10 <sup>-4</sup> | CDK1         |
| Homologous recombination repair of replication-independent double-strand breaks | 1 | 19  | 0.002                 | 0.029 | 0.032 | 4 | 24 | 0.003                 | RAD51        |
| Homologous Recombination Repair                                                 | 1 | 19  | 0.002                 | 0.029 | 0.032 | 4 | 24 | 0.003                 | RAD51        |
| APC/C:Cdc20 mediated degradation of Cyclin B                                    | 1 | 21  | 0.002                 | 0.032 | 0.032 | 3 | 3  | 3.99x10 <sup>-4</sup> | CDK1         |
| RAF/MAP kinase cascade                                                          | 1 | 21  | 0.002                 | 0.032 | 0.032 | 1 | 19 | 0.003                 | CDK1         |

|                                            |   |    |       |       |       |   |    |                       |       |
|--------------------------------------------|---|----|-------|-------|-------|---|----|-----------------------|-------|
| Depolymerisation of the Nuclear Lamina     | 1 | 23 | 0.002 | 0.035 | 0.035 | 2 | 6  | 7.99x10 <sup>-4</sup> | CDK1  |
| Double-Strand Break Repair                 | 1 | 25 | 0.003 | 0.038 | 0.038 | 4 | 32 | 0.004                 | RAD51 |
| SOS-mediated signalling                    | 1 | 26 | 0.003 | 0.040 | 0.040 | 1 | 21 | 0.003                 | CDK1  |
| GRB2 events in EGFR signaling              | 1 | 26 | 0.003 | 0.040 | 0.040 | 1 | 22 | 0.003                 | CDK1  |
| Recruitment of NuMA to mitotic centrosomes | 1 | 27 | 0.003 | 0.041 | 0.041 | 1 | 3  | 3.99x10 <sup>-4</sup> | CDK1  |
| G0 and Early G1                            | 1 | 27 | 0.003 | 0.041 | 0.041 | 1 | 10 | 0.001                 | CDK1  |
| SHC-mediated signalling                    | 1 | 27 | 0.003 | 0.041 | 0.041 | 1 | 21 | 0.003                 | CDK1  |
| SHC1 events in EGFR signaling              | 1 | 27 | 0.003 | 0.041 | 0.041 | 1 | 23 | 0.003                 | CDK1  |
| Signalling to p38 via RIT and RIN          | 1 | 28 | 0.003 | 0.042 | 0.042 | 1 | 22 | 0.003                 | CDK1  |
| ARMS-mediated activation                   | 1 | 29 | 0.003 | 0.044 | 0.044 | 1 | 24 | 0.003                 | CDK1  |
| SHC-related events                         | 1 | 30 | 0.003 | 0.045 | 0.045 | 1 | 24 | 0.003                 | CDK1  |
| Signaling by Leptin                        | 1 | 30 | 0.003 | 0.045 | 0.045 | 1 | 38 | 0.005                 | CDK1  |
| Frs2-mediated activation                   | 1 | 32 | 0.003 | 0.048 | 0.048 | 1 | 25 | 0.003                 | CDK1  |
| Activation of the pre-replicative complex  | 1 | 33 | 0.003 | 0.050 | 0.050 | 4 | 8  | 0.001                 | CDC45 |
| SHC-related events triggered by IGF1R      | 1 | 33 | 0.003 | 0.050 | 0.050 | 1 | 23 | 0.003                 | CDK1  |



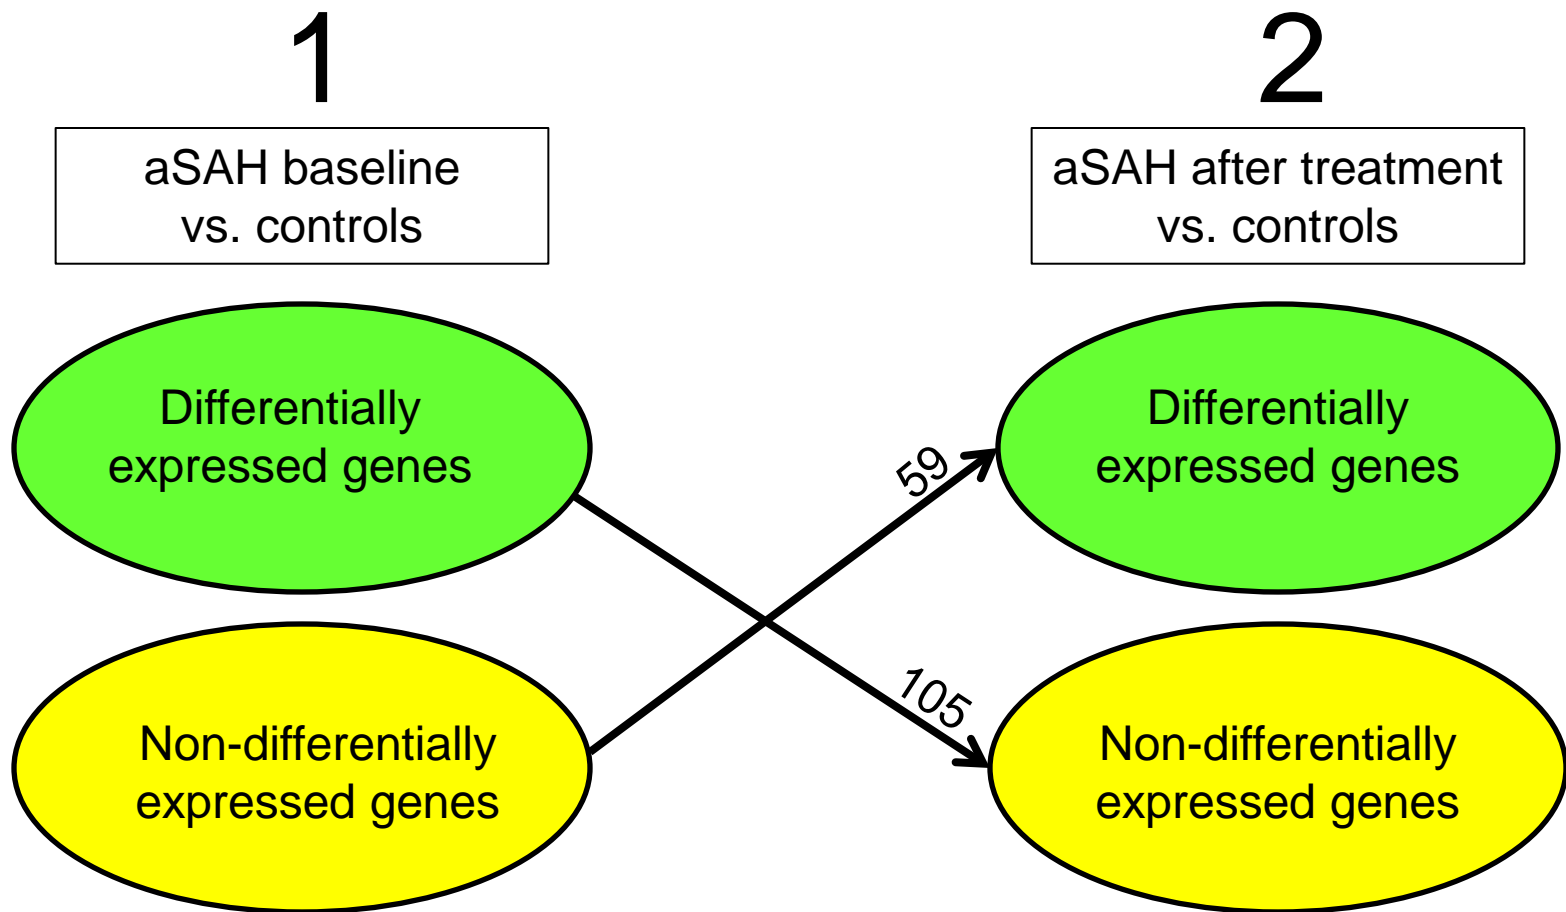

Figure I. Schematic overview of the analysis of the 451 differentially expressed (DE) genes using the controls who did not receive the treatment. We subsequently focused on the 164 genes that changed the DE status between the two analyses.

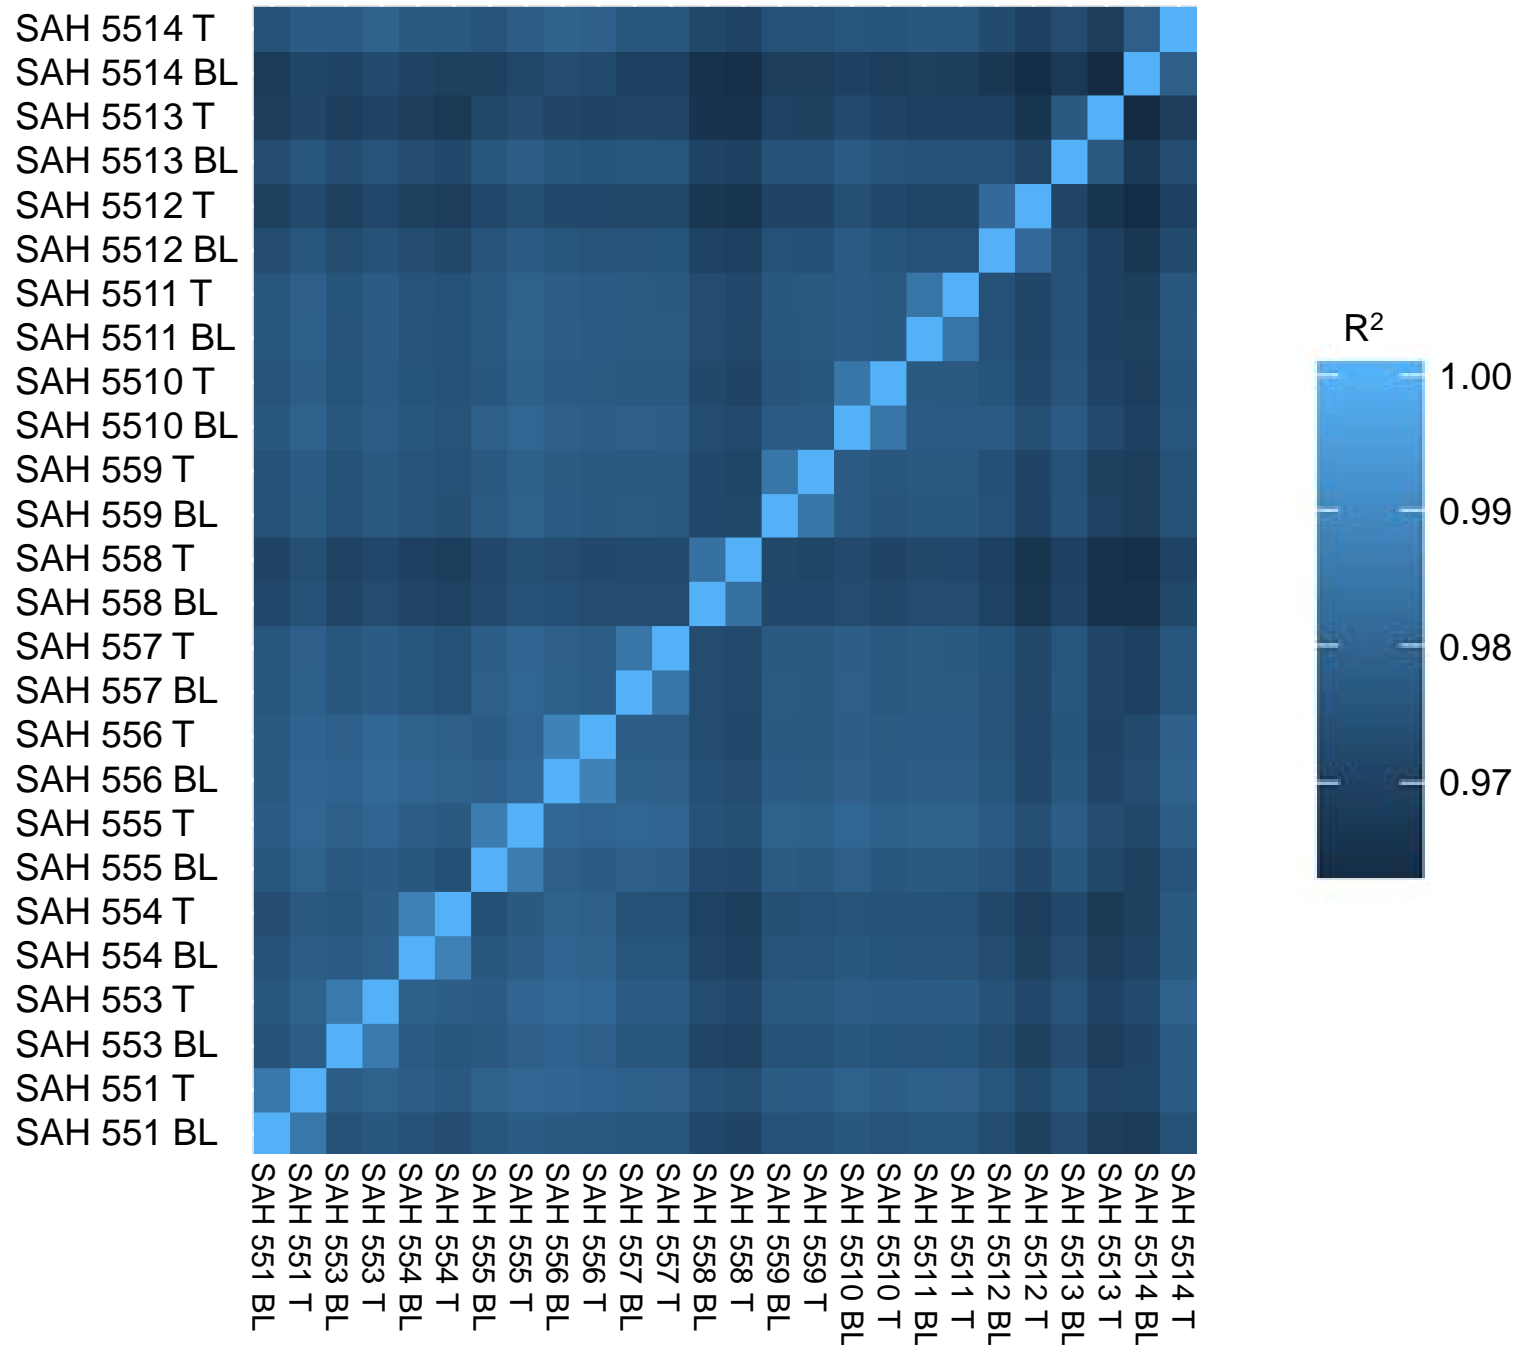

Figure II. The correlation of 676,543 CpG sites assayed in all individuals between the samples. BL indicates baseline and T indicates treatment. The overall methylation status changed very little within an individual (~98%) and between the individuals (~97.5%).
